1 **Gene knockout shows that PML (TRIM19) does not restrict the early stages of HIV-1**  
2 **infection in human cell lines**

3 Nasser Masroori<sup>1</sup>, Pearl Cherry<sup>1</sup>, Natacha Merindol<sup>1</sup>, Jia-xin Li<sup>1</sup>, Caroline Dufour<sup>1</sup>, Lina  
4 Poulain<sup>1</sup>, Mélodie B. Plourde<sup>1</sup>, Lionel Berthoux<sup>1,\*</sup>

5 Running title: PML does not restrict HIV-1 in human cells

6 <sup>1</sup>Laboratory of antiviral immunity, Department of medical biology and BioMed research group,  
7 Université du Québec à Trois-Rivières, 3351 Boulevard des Forges, Trois-Rivières, QC G9A 5H7,  
8 Canada.

9 \* Author to whom correspondence should be addressed; E-Mail: [berthoux@uqtr.ca](mailto:berthoux@uqtr.ca);

10 Tel.: +1-819-376-5011 (ext. 4466); Fax: +1-819-376-5084.

11

12 Word count (abstract): 245

13 Word count (main text): 5,846

## 14 **Abstract**

15 The PML (promyelocytic leukemia) protein is a member of the TRIM family, a large group of  
16 proteins that show high diversity in functions but possess a common tripartite motif giving the  
17 family its name. We and others recently reported that both murine PML (mPML) and human  
18 PML (hPML) strongly restrict the early stages of infection by HIV-1 and other lentiviruses when  
19 expressed in mouse embryonic fibroblasts (MEFs). This restriction activity was found to  
20 contribute to the type I interferon (IFN-I)-mediated inhibition of HIV-1 in MEFs. Additionally,  
21 PML caused transcriptional repression of the HIV-1 promoter in MEFs. By contrast, the  
22 modulation of the early stages of HIV-1 infection of human cells by PML has been investigated  
23 by RNAi with unclear results. In order to conclusively determine whether PML restricts HIV-1  
24 or not in human cells, we used CRISPR-Cas9 to knock out its gene in epithelial, lymphoid and  
25 monocytic human cell lines. Infection challenges showed that PML knockout had no effect on  
26 the permissiveness of these cells to HIV-1 infection. IFN-I treatments inhibited HIV-1 equally  
27 whether PML was expressed or not. Over-expression of individual hPML isoforms, or of mPML,  
28 in a human T cell line did not restrict HIV-1. The presence of PML was not required for the  
29 restriction of nonhuman retroviruses by TRIM5 $\alpha$ , another human TRIM protein, and TRIM5 $\alpha$   
30 was inhibited by arsenic trioxide through a PML-independent mechanism. We conclude that  
31 PML is not a restriction factor for HIV-1 in human cell lines representing diverse lineages.

## 32 **Importance**

33 PML is involved in innate immune mechanisms against both DNA and RNA viruses. Although  
34 the mechanism by which PML inhibits highly divergent viruses is unclear, it was recently found  
35 that it can increase the transcription of interferon-stimulated genes (ISGs). However, whether  
36 human PML inhibits HIV-1 has been debated. Here we provide unambiguous, knockout-based

37 evidence that PML does not restrict the early post-entry stages of HIV-1 infection in a variety of  
38 human cell types and does not participate in the inhibition of HIV-1 by IFN-I. Although this  
39 study does not exclude the possibility of other mechanisms by which PML may interfere with  
40 HIV-1, we nonetheless demonstrate that PML does not generally act as an HIV-1 restriction  
41 factor in human cells and that its presence is not required for IFN-I to stimulate the expression of  
42 anti-HIV-1 genes. These results contribute to uncovering the landscape of HIV-1 inhibition by  
43 ISGs in human cells.

## 44 **Introduction**

45 PML/TRIM19 belongs to the tripartite motif (TRIM) protein superfamily that shares a conserved  
46 tripartite architecture: a RING domain, one or two B-boxes, and a coiled-coil domain (1). Due to  
47 the alternative splicing of the C-terminal domain, seven PML isoforms are present in human  
48 cells. Isoforms I to VI are primarily located in the nucleus, while PML VII is mostly cytoplasmic  
49 (2). PML is the major component of a nuclear substructure named PML nuclear body (PML  
50 NB). PML NBs are dynamic and their size, number, and composition change in response to  
51 cellular stresses or during the cell cycle. In addition to PML, these NBs recruit many other  
52 proteins in a transient fashion (3-6). TRIM5 $\alpha$ , a cytoplasmic factor that restricts retroviruses in a  
53 species-specific, virus-specific manner (7), is actively shuttling between the cytoplasm and the  
54 nucleus and localizes to the PML NBs when present in the nucleus (8). PML is involved in many  
55 cellular activities including transcriptional regulation and tumor suppression (5, 9, 10).

56 IFNs are a multigene family of inducible cytokines released by host cells in response to  
57 pathogens, including viruses (11-13). IFN-I binding to its receptor leads to the transcriptional  
58 stimulation of a set of genes encoding antiviral proteins which inhibit the replication of a wide  
59 range of viruses (12, 14). The transcription of PML and of many NB-associated proteins (e.g.  
60 Daxx and Sp100) is up-regulated by IFN-I (15, 16). Conversely, it was recently proposed that  
61 PML is involved in the IFN-I-induced expression of ISGs by directly binding their promoter  
62 (17).

63 The involvement of PML in antiviral defense mechanisms against several DNA and RNA  
64 viruses has been extensively studied. PML was shown to restrict a complex retrovirus, the human  
65 foamy virus, by inhibiting viral gene expression (18). PML deficient cells are also more prone to  
66 infection with rabies virus (19). Moreover, PML was shown to interfere with the replication of

67 poliovirus (20), encephalomyocarditis virus (EMCV) (21), herpes simplex virus type-1 (HSV-1),  
68 adeno-associated virus (AAV) (22), influenza virus, and vesicular stomatitis virus (VSV) (23).  
69 As a direct consequence, some viruses such as HSV-1 and the human cytomegalovirus have  
70 evolved mechanisms to counteract PML, either by disrupting PML NBs and/or by inducing PML  
71 degradation (24-26).

72 The role of PML in HIV-1 infection of human cells is controversial.  $As_2O_3$ , a drug that induces  
73 PML oligomerization and degradation (27), was shown to increase the susceptibility of human  
74 cells to N-tropic murine leukemia virus (N-MLV) and HIV-1 (28). A recent study proposed that  
75 PML was an indirect inhibitor of HIV-1 early post-entry infection stages through its association  
76 with Daxx, a constitutive partner protein in PML NBs (29). However, another group found that  
77 the depletion of PML (but not that of Daxx) enhanced HIV-1 infection in human primary  
78 fibroblasts, while having no effect in T cell lines such as Jurkat (30). PML was also found to  
79 regulate HIV-1 latency. Specifically, PML degradation or NBs disruption resulted in the  
80 activation of HIV-1 provirus transcription in a lymphoid model of HIV-1 latency (31), although  
81 these results have not been independently confirmed. There is consensus, however, on the  
82 existence of a PML-dependent restriction of HIV-1 in MEFs. In these cells, PML inhibits the  
83 early post-entry stages of infection (32-34) and also promotes the transcriptional silencing of the  
84 integrated provirus (34). Human PML (hPML) was able to reconstitute both restriction activities  
85 in MEFs knocked out for the endogenous murine PML (mPML), in an isoform-specific fashion  
86 (34). In addition, the inhibition of lentiviruses by IFN-I in MEFs involves PML (34). In this  
87 study, we investigate the role of PML in the restriction of HIV-1 and other retroviruses in several  
88 human cell lines, including T cells and myeloid cells, by gene knockout. We also examine the  
89 role of PML in the IFN-induced restriction of lentiviruses in human cells. We show that PML is

90 dispensable for the restriction of lentiviruses in human cells, is not involved in the IFN-I-  
91 mediated inhibition of infection, and is not relevant to the inhibition of TRIM5 $\alpha$  by As<sub>2</sub>O<sub>3</sub>.

92

## 93 **Results**

94 **CRISPR-Cas9-mediated knockout of PML in human cells.** In order to stably and irreversibly  
95 deplete PML in human cells, we designed two guide RNAs (gRNAs), hPML1 and hPML2, to  
96 target the Cas9 nuclease towards exon 2 of *PML* (Fig. 1). Exon 2 is present in all hPML  
97 isoforms, and the algorithm used to design the gRNAs minimizes the risk of nonspecific  
98 targeting. The plasmid used in this study, pLentiCRISPRv2 (pLCv2), can mediate knockouts  
99 through transfection and also through lentiviral transduction. The control plasmid, pLCv2-CAG,  
100 targets the CMV-IE/chicken actin/rabbit beta globin hybrid promoter, a nonhuman sequence  
101 (35). We used the Surveyor assay (36) to reveal the presence of insertions/deletions (indels) in  
102 the PML gene of HEK293T cells transiently transfected with pLCv2-hPML1 or pLCv2-hPML2.  
103 We could observe the presence of PML DNA digestion products of the expected size in cells  
104 transfected with each of the PML gRNAs but not in cells transfected with the control gRNA  
105 (Fig. 1A), indicating that both PML gRNAs generated double-strand breaks that were repaired  
106 by non-homologous end joining (NHEJ). To quantify the extent of DNA damage following  
107 stable lentiviral transduction of the CRISPR components, we transduced human monocytic THP-  
108 1 cells with the LCv2-hPML1 vector and, as a control, the irrelevant LCv2-CAG vector. Cells  
109 were treated with puromycin to eliminate non-transduced cells, and amplicons of the targeted  
110 PML region were then obtained and Sanger sequenced. A reference contig alignment of the  
111 sequencing plots revealed that a -1 deletion was the most prevalent mutation found in LCv2-  
112 hPML1-transduced cells, but other types of indels were present, as evidenced by the presence of

113 additional peaks at each position (Fig. 1B). We further analyzed the sequencing data using the  
114 Tracking of Indels by Decomposition (TIDE) method available online (see Methods) (Fig. 1C).  
115 Computations using this assay showed that at least 96.3% of PML alleles contained an indel at  
116 the expected position in cells transduced with the hPML1 gRNA.

117 **Knocking out PML in human monocytic cells has little to no effect on the permissiveness to**  
118 **HIV-1 in the presence or absence of IFN- $\beta$ .** THP-1 cells were stably transduced with lentiviral  
119 vectors produced using pLCv2-hPML1 and pLCv2-hPML2. Following puromycin selection, we  
120 performed a Western blotting (WB) analysis of PML levels in bulk populations (Fig. 2A). The  
121 levels of hPML were not sufficiently high to be detected in unstimulated cells (not shown), and  
122 therefore, the analysis was done using cells treated with IFN- $\beta$ . In control cells we found several  
123 bands corresponding to hPML isoforms, as previously reported (2). In the cells transduced with  
124 the hPML gRNAs, PML was undetectable, showing that knockout was efficient with both  
125 gRNAs and affected all detectable isoforms. This result is consistent with the NHEJ-mediated  
126 mutagenesis observed in transfected HEK293T cells using both gRNAs shown in Fig. 1. As both  
127 gRNAs showed similar efficiency, all the subsequent experiments in this study were only  
128 performed with one gRNA, hPML1. We next infected PML knockout (hPML1 gRNA  
129 transduced) and control cells (CAG transduced) with a single dose of HIV-1<sub>NL-GFP</sub> (37), a VSV-  
130 G-pseudotyped,  $\Delta$ -Envelope HIV-1 vector expressing GFP in place of Nef (Fig. 2B). The  
131 percentage of GFP-positive cells following HIV-1<sub>NL-GFP</sub> challenge is directly proportional to the  
132 cells' permissiveness toward infection by this virus. This system is thus well-suited to analyze  
133 restriction activities taking place during post-entry steps and until integration. These infections  
134 were performed in the presence or absence of IFN- $\beta$ , owing to the reported role of PML in  
135 stimulating the transcription of ISGs (38). In the absence of IFN- $\beta$ , we found that the PML-KO

136 cells were slightly more permissive to infection by HIV-1<sub>NL-GFP</sub> compared with the control cells  
137 (less than 2-fold). The addition of IFN- $\beta$  very strongly inhibited (>20-fold) the infection of THP-  
138 1 cells (Fig. 2B), and the low numbers of infected cells prevented a fine analysis of the role of  
139 PML in this inhibition. However, the absence of PML clearly did not prevent IFN- $\beta$  from  
140 inhibiting HIV-1<sub>NL-GFP</sub>, showing that PML was dispensable for this activity.

141 In order to obtain a more complete picture of the importance of PML in the permissiveness to  
142 retroviruses in this immune cell line, we performed additional infections with this HIV-1 vector  
143 as well as with GFP-expressing vectors derived from the macaque strain of the simian  
144 immunodeficiency virus (SIV<sub>mac-GFP</sub>), the equine infectious anemia virus (EIAV<sub>GFP</sub>) and the B-  
145 tropic murine leukemia virus (B-MLV<sub>GFP</sub>). EIAV is restricted by TRIM5 $\alpha$  in human cells (39),  
146 making it possible to analyze whether PML modulates the restriction of retroviruses by this well-  
147 characterized restriction factor. Infectivity of the three lentiviral vectors (HIV-1, SIV<sub>mac</sub>, EIAV)  
148 was slightly higher in the absence of PML at most virus doses used, whereas infectivity of the B-  
149 MLV vector was unaffected by PML knockout (Fig. 2C). These results suggest that PML has a  
150 small, barely detectable inhibitory effect on the infection of THP-1 cells by lentiviruses and does  
151 not modulate TRIM5 $\alpha$  activity. Treatment with IFN- $\beta$  strongly decreased THP-1 permissiveness  
152 to all four vectors, preventing us from measuring the -fold decrease in infectivity with accuracy  
153 (Fig. 2C). However, it was clear that IFN- $\beta$  efficiently inhibited infection in the presence or  
154 absence of PML, indicating that PML is not crucial for the IFN-I-mediated anti-retroviral  
155 response.

156 **Knocking out PML in human epithelial cells has little to no effect on the permissiveness to**  
157 **retroviral infections in the presence or absence of IFN-I.** We then transduced epithelial  
158 carcinoma HeLa cells with the CAG or PML gRNAs. PML was efficiently knocked out, as seen



159 by WB (Fig. 3A). We also performed immunofluorescence microscopy to analyze the effect of  
160 PML knockout on PML and SUMO nuclear bodies. A large part (but not all) of SUMO-1  
161 localizes to PML bodies in normal conditions (40). As expected, signal corresponding to PML  
162 nuclear bodies almost completely disappeared from the cells transduced with the PML gRNA  
163 (Fig. 3B). In addition, SUMO-1 punctate nuclear staining was strongly diminished but not  
164 abolished (Fig. 3B). We then challenged the stably transduced cells with GFP-expressing viral  
165 vectors like we had done in THP-1 cells. We found that susceptibility to HIV-1, SIVmac, EIAV  
166 and B-MLV vectors was identical whether PML was present or not (Fig. 3C-D). IFN- $\beta$  inhibited  
167 all four viral vectors, although the magnitude of this effect (~2- to 3-fold) was much smaller than  
168 in THP-1 cells. IFN- $\beta$  treatments had identical effects in PML-expressing and PML-knockout  
169 cells, again showing that PML does not modulate this inhibitory pathway in human cells.

170 Rhabdomyosarcoma-derived epithelial TE671 cells were similarly knocked out for PML by  
171 lentiviral transduction, and knockout was efficient (Fig. 4A). Similar to what we found in HeLa  
172 cells, infectivity of the four vectors tested was identical whether PML was present or not (Fig.  
173 4B). IFN- $\beta$  decreased the permissiveness of TE671 cells to all four vectors, although we noticed  
174 that IFN- $\beta$  had a relatively smaller effect on HIV-1<sub>NL-GFP</sub> compared with the three other vectors  
175 in TE671 (Fig. 4B). The IFN- $\beta$ -induced inhibition of the four retroviral vectors in TE671 cells  
176 was identical whether PML was present or not (Fig. 4B).

177 **A knock-in approach to suppress PML in human cells.** In order to achieve efficient knockout  
178 by transient transfection without the need to isolate cellular clones by limiting dilution, we  
179 constructed a plasmid to serve as donor DNA in homology-directed repair (HDR). This plasmid  
180 contains two ~800bp-long PML homology arms surrounding a neomycin resistance cassette (Fig.  
181 5A). It is expected that its co-transfection in cells along with Cas9 and the hPML gRNA1 would

182 lead to the knock-in of  $Neo^R$  in *PML* through HDR in a fraction of the cells. Selection in  
183 neomycin then eliminates cells in which the knock-in did not occur. Even if not all alleles of a  
184 given gene are successfully modified by knock-in, recent reports indicate that the remaining ones  
185 are usually knocked out through NHEJ-dependent mechanisms (41). We designed PCR primers  
186 for the specific amplification of the knock-in product and another pair to amplify the wild-type  
187 (WT) or the NHEJ-repair knockout alleles (Fig. 5A). To validate this system, we co-transfected  
188 TE671 cells with pLCv2.PML1 and the HDR donor plasmid, and randomly isolated a number of  
189 neomycin-resistant cell clones of which a representative analysis is shown in Fig. 5B. The  
190 knock-in product was detected as expected in all 7 clones while being absent in the parental  
191 cells. On the other hand, the band corresponding to WT or NHEJ-repaired alleles was less  
192 intense in these clones relative to the parental cells, but was always present, suggesting that  
193 HDR-mediated knockout did not affect all the *PML* alleles.

194 **PML is important for the efficient inhibition of SIV<sub>mac</sub> but not HIV-1 by IFN-I in**  
195 **lymphoid cells.** We knocked out PML in Jurkat cells using the transfection approach that results  
196 in the insertion of  $Neo^R$  in *PML*, as described above. We performed WB analyses to assess  
197 knockout efficiency. (Fig. 6A). Treatment with the IFN-I species IFN- $\alpha$ , IFN- $\beta$  and IFN- $\omega$   
198 stimulated PML expression in Jurkat cells. PML was efficiently knocked out (Fig. 6A),  
199 validating the HDR-based approach. In the absence of IFN- $\beta$ , PML had little effect on the  
200 infectivity of all four vectors ( $\square$ 2-fold) (Fig. 6B). The effect of IFN- $\beta$  treatment differed  
201 according to the retroviral vector used (Fig. 6B). IFN- $\beta$  treatment decreased HIV-1<sub>NL-GFP</sub>  
202 infectivity by  $\sim$ 3.5-fold in both control and PML-KO cells. IFN- $\beta$  similarly decreased the  
203 infectivity of SIV<sub>mac-GFP</sub> by about 4-fold, but only in the control cells. In the PML-KO cells, the  
204 inhibitory effect of IFN- $\beta$  on SIV<sub>mac-GFP</sub> infectivity was smaller ( $\square$ 2-fold). Interestingly, we

205 found the opposite situation upon challenge with the EIAV<sub>GFP</sub> vector: IFN- $\beta$  treatment had no  
206 effect on EIAV<sub>GFP</sub> infectivity in the WT Jurkat cells, whereas it significantly inhibited this vector  
207 in PML-KO cells, especially at low vector doses. Finally, IFN- $\beta$  decreased the infectivity of B-  
208 MLV<sub>GFP</sub> in both WT cells and PML-KO cells, with no apparent specificity. Thus, Jurkat cells  
209 provided a more complex situation with respect to the importance of PML in the antiviral effects  
210 of IFN- $\beta$ . In order to further study the contrasting phenotypes of the HIV-1 and SIVmac vectors  
211 in these cells, we also analyzed the effects of IFN- $\alpha$  and IFN- $\omega$ . (Fig. 6C). We found that in  
212 control cells, all three IFN-I species decreased infectivity of both the HIV-1 and the SIVmac  
213 vectors, by 2- to 4-fold; IFN- $\beta$  appearing to be the most consistently inhibitory IFN-I in these  
214 cells, similar to what we had observed in other cell lines (not shown) and to what was reported in  
215 the literature (42). In PML-KO cells, HIV-1<sub>NL-GFP</sub> was inhibited by all three IFN-I species,  
216 similar to the control cells. In contrast, IFN-I inhibition of SIV<sub>mac-GFP</sub> was much less efficient in  
217 PML-KO cells (Fig. 6C, bottom right panel). Thus, PML is important for IFN-I to inhibit the  
218 early infection stages of SIVmac, but not HIV-1, in Jurkat cells.

219 **Over-expression of murine or human PML in Jurkat cells does not affect the infectivity of**  
220 **an HIV-1 vector.** Unlike the PML-KO THP-1, HeLa and TE671 cells, the PML-KO Jurkat cells  
221 generated do not continuously express Cas9 or a PML-targeting gRNA. Thus, these cells  
222 provided an appropriate model to test whether the over-expression of specific hPML isoforms in  
223 a PML-KO background could inhibit HIV-1 or other retroviruses. In other words, this  
224 experiment was designed to reveal a possible cryptic restriction activity associated with specific  
225 PML isoforms that would normally not be apparent due to the presence of other isoforms. We  
226 retrovirally transduced the isoforms I to VI of hPML into PML-KO Jurkat cells, separately.  
227 Because HIV-1 is inhibited by mPML in MEFs (32-34), we also transduced mPML. A WB

228 analysis showed that all six isoforms of hPML were expressed, as was mPML isoform 2 (Fig.  
229 7A). We then challenged the various cell cultures with the HIV-1, SIV<sub>mac</sub>, EIAV and B-MLV  
230 vectors (Fig. 7B). We found that none of the PML isoforms had an effect on GFP transduction  
231 by HIV-1<sub>NL-GFP</sub>. Interestingly, several hPML isoforms and mPML slightly increased  
232 permissiveness to SIV<sub>mac-GFP</sub>, by ~2-fold. Permissiveness to EIAV<sub>GFP</sub> was overall not modulated  
233 by over-expression of hPML or mPML, although a slight increase in infectivity was observed in  
234 presence of some hPML isoforms at the highest virus doses tested. Finally, the presence of  
235 hPML-VI slightly inhibited infection by B-MLV<sub>GFP</sub> at least at some virus doses used (Fig. 7B).  
236 Thus, although individual PML isoforms modestly modulated the permissiveness to infection by  
237 the SIV<sub>mac</sub>, EIAV and B-MLV vectors in a virus-specific fashion, none of them affected  
238 permissiveness to infection by the HIV-1 vector.

239 **Restriction of N-MLV by TRIM5 $\alpha$  and inhibition of TRIM5 $\alpha$  by arsenic trioxide are**  
240 **independent of PML.** Intriguingly, TRIM5 $\alpha$  localizes at PML bodies when shuttling to the  
241 nucleus, as demonstrated by pharmacological treatment interfering with its nuclear export (43).  
242 The possibility of PML involvement in the inhibition of retroviruses by TRIM5 $\alpha$  has been  
243 envisioned but not proven. The infectivity of the EIAV vector used here (which is restricted 5-  
244 10-fold by human TRIM5 $\alpha$  (44)) was not significantly affected by knocking out PML (Fig. 2-4),  
245 suggesting that TRIM5 $\alpha$  does not require PML. In order to increase sensitivity, we used an “N-  
246 tropic” strain of MLV, which is even more strongly restricted by human TRIM5 $\alpha$  (39, 45) than  
247 EIAV, and of which restriction is counteracted by As<sub>2</sub>O<sub>3</sub> in a cell context-specific fashion (46,  
248 47). Thus, As<sub>2</sub>O<sub>3</sub> greatly increases the infectivity of N-MLV but not B-MLV vectors in many  
249 human cell lines. The mechanism of action of As<sub>2</sub>O<sub>3</sub> against TRIM5 $\alpha$  has not been determined  
250 but it was thought to involve PML, since As<sub>2</sub>O<sub>3</sub> is well-known as a specific inhibitor of PML

251 (27, 48). Interestingly, As<sub>2</sub>O<sub>3</sub> also enhances the infectivity of HIV-1 in human cells, although the  
252 magnitude of this effect is milder than what is found with N-MLV (46, 49). The molecular basis  
253 for the effect of As<sub>2</sub>O<sub>3</sub> on HIV-1 and B-MLV vectors is unclear but is probably independent of  
254 TRIM5 $\alpha$  and instead may be related to unidentified restriction factors (50, 51). We infected  
255 HeLa, TE671 and Jurkat cells with HIV-1<sub>NL-GFP</sub>, B-MLV<sub>GFP</sub> and N-MLV<sub>GFP</sub> in the presence of  
256 increasing As<sub>2</sub>O<sub>3</sub> concentrations (Fig. 8A). In the absence of As<sub>2</sub>O<sub>3</sub>, N-MLV<sub>GFP</sub> infectivity was  
257 barely detectable or undetectable in all three cell lines, reflecting the strong inhibition conferred  
258 by TRIM5 $\alpha$  in human cells. At the same virus dose, B-MLV<sub>GFP</sub> infected 3% to 5% of the cells.  
259 PML knockout had no effect on the infectivity of the two MLV vectors, implying that PML is  
260 not required for TRIM5 $\alpha$ -mediated restriction of N-MLV. In presence of As<sub>2</sub>O<sub>3</sub>, N-MLV<sub>GFP</sub>  
261 infectivity was greatly enhanced, although the stimulating effect was partly reversed at high  
262 As<sub>2</sub>O<sub>3</sub> concentrations in HeLa and TE671 cells (Fig. 8A). As<sub>2</sub>O<sub>3</sub> effectiveness at counteracting  
263 TRIM5 $\alpha$ -mediated restrictions was found to decrease at high concentrations in previous studies  
264 as well (47, 49). In contrast to N-MLV<sub>GFP</sub>, B-MLV<sub>GFP</sub> was only slightly enhanced by As<sub>2</sub>O<sub>3</sub>. As  
265 reported before, As<sub>2</sub>O<sub>3</sub> modestly increased HIV-1<sub>NL-GFP</sub> infection of HeLa and TE671 cells,  
266 although it had no effect on this vector in Jurkat cells (Fig. 8B). Knocking out PML had no  
267 detectable effect on the As<sub>2</sub>O<sub>3</sub>-mediated stimulation of N-MLV<sub>GFP</sub> and HIV-1<sub>NL-GFP</sub> in the three  
268 cell lines tested. We performed an additional infection of the HeLa cells with the N-MLV and B-  
269 MLV vectors, this time at a fixed As<sub>2</sub>O<sub>3</sub> concentration and varying virus doses. Again, we  
270 observed that (i) PML had no effect on the infectivity of N-MLV<sub>GFP</sub> and B-MLV<sub>GFP</sub>, (ii) As<sub>2</sub>O<sub>3</sub>-  
271 mediated stimulation of N-MLV<sub>GFP</sub> was significantly stronger than that of B-MLV<sub>GFP</sub>, regardless  
272 of the virus dose, and (iii) knocking out PML had no impact on the effect of As<sub>2</sub>O<sub>3</sub> on the MLV  
273 vectors. These data demonstrate that PML is not involved in the restriction of N-MLV by

274 TRIM5 $\alpha$ , nor is it involved in the mechanism by which As<sub>2</sub>O<sub>3</sub> stimulates retroviral infections and  
275 counteracts TRIM5 $\alpha$ .

276 **PML is not required for TRIM5 $\alpha$ -mediated restriction of HIV-1 in MEFs.** MEFs provide a  
277 cellular environment in which PML restricts HIV-1, as seen by several laboratories (32-34). In  
278 addition, PML also inhibits HIV-1 transcription in MEFs, an effect that we did not observe in  
279 human cells (34). Thus, it would be conceivable for PML to have an impact on TRIM5 $\alpha$ -  
280 mediated restriction of HIV-1 in this specific cellular environment. To test this hypothesis, we  
281 used PML-KO MEFs (34, 52). WT and PML-KO MEFs were stably transduced with the HIV-1-  
282 restrictive Rhesus macaque TRIM5 $\alpha$  or the non-restrictive human TRIM5 $\alpha$  as a control. The  
283 cells were also transduced with the C35A RING domain mutant of each TRIM5 $\alpha$  ortholog,  
284 which abolishes the RING domain-associated ubiquitin ligase activity (53). WB analyses showed  
285 that the transduced TRIM5 $\alpha$  variants were expressed at comparable levels (Fig. 9A).  
286 Colocalization of a fraction of TRIM5 $\alpha$  with PML NBs was seen in the presence of the nuclear  
287 export inhibitor leptomycin B, consistent with published data obtained in human and canine cells  
288 (43), and exposure of the cells to HIV-1 did not modify this pattern (Fig. 9B). The cells were  
289 then challenged with HIV-1<sub>NL-GFP</sub> or with the relatively restriction insensitive SIV<sub>mac-GFP</sub> as a  
290 control (54), using virus doses at which PML has only mild effects on transduction by these  
291 lentiviral vectors in the absence of TRIM5 $\alpha$  (34). HIV-1 was very strongly restricted by  
292 rhTRIM5 $\alpha$  in both WT and PML-KO MEF cells (Fig. 9C). As expected, C35A rhTRIM5 $\alpha$  and  
293 hTRIM5 $\alpha$  (WT or C35A) had little to no effect on HIV-1<sub>NL-GFP</sub>, although we observed slightly  
294 higher levels of HIV-1 restriction by C35A rhTRIM5 in the presence of PML, perhaps  
295 suggesting that the presence of PML could partially compensate for the loss of a functional  
296 TRIM5 $\alpha$  RING domain. SIV<sub>mac-GFP</sub> was moderately restricted by rhTRIM5 $\alpha$ , and PML knockout

297 did not affect this inhibitory effect (in fact, restriction was slightly greater in the absence of  
298 PML) (Fig. 9C). In conclusion, PML is not required for rhTRIM5 $\alpha$  to restrict HIV-1.

299

## 300 **Discussion**

301 Whether PML has an impact or not on the infection of human cells by HIV-1 has been an open  
302 question for over 15 years. Trono and colleagues reported that PML is transiently exported in the  
303 cytoplasm following exposure to HIV-1 and co-localizes with the incoming virus in HeLa cells  
304 (55); however, this study did not include functional evidence for the involvement of PML in  
305 HIV-1 infection. Another team found no effect of HIV-1 infection on the distribution of PML  
306 bodies (56). As<sub>2</sub>O<sub>3</sub>, a known PML inhibitor, was found to enhance the infection of human cells  
307 with HIV-1 (46, 55) but it also stimulated the infection of MEFs with HIV-1 vectors whether  
308 PML was present or not (46). Interest for PML as a modulator of HIV-1 infection surfaced again  
309 in recent years, as it was proposed to act as an HIV-1 restriction factor in mouse and human cells  
310 (33). However, the data gathered so far by three different teams, including this study, suggest  
311 that the restriction activity in human cells, if it exists, is cell type-specific. Dutrieux and  
312 colleagues, using shRNAs, observed a modest inhibition of HIV-1 vector transduction conferred  
313 by PML in HeLa cells (<2-fold). They also observed a small delay in HIV-1 propagation in  
314 peripheral blood mononuclear cells, but the decrease in infectivity was not quantified (33). We  
315 previously observed that knocking down PML in T-lymphoid Sup-T1 cells increases HIV-1  
316 infectivity by 2- to 4-fold (34). On the other hand, Kahle and colleagues saw no effect of  
317 knocking down PML on the infectivity of an HIV-1 vector in T lymphoid cell lines including  
318 CEM, HuT78, Jurkat and Molt4 (32). They showed, however, that PML reduces HIV-1  
319 infectivity in human foreskin fibroblasts by 2- to 3-fold (32). Taken together, those previous

320 papers showed that knocking down PML has either no effect or modest effects on HIV-1  
321 infectivity in human cells. We were not able to efficiently knock out PML in Sup-T1 cells,  
322 preventing us from drawing comparisons with our previous knockdown results. However, our  
323 knockout experiments in Jurkat, THP-1, HeLa and TE671 are not consistent with PML being an  
324 HIV-1 restriction factor in human cells.

325 A recent study by Kim and Ahn (38) uncovered an additional function for PML in human skin  
326 fibroblasts: the stimulation of ISG expression through a direct association with their promoter.  
327 Accordingly, we previously showed that PML was important for the efficient inhibition of HIV-1  
328 by IFN-I in MEF cells (34). Although HIV-1 is also readily inhibited by IFN-I in a variety of  
329 human cell types, as illustrated in our study, we find that this effect is not affected by knocking  
330 out PML. However, we cannot exclude the possibility that PML is involved in regulating IFN-I-  
331 dependent transcription in specific cellular contexts such as skin fibroblasts (38). It is also  
332 possible that PML stimulates the transcription of some ISGs but not others. In support of this  
333 idea is our observation that SIVmac inhibition by IFN-I in Jurkat cells was significantly greater  
334 in the presence of PML. SIVmac, but not HIV-1, is inhibited by an unidentified restriction factor  
335 in Jurkat cells and other T cells, provisionally called Lv4 (51). It is conceivable that the gene  
336 encoding Lv4 is specifically stimulated by IFN-I in a PML-dependent fashion in Jurkat cells.  
337 This characteristic could be exploited to identify this gene, similar to the strategy that led to the  
338 identification of Tetherin as a retroviral restriction factor (57).

339 In our previous study (34), we showed that PML inhibited HIV-1 transcription in MEFs but not  
340 in Sup-T1 cells and in an IFN-I-independent fashion. We analyzed GFP mean fluorescence  
341 intensity in all our experiments for this study, as a surrogate for HIV-1 gene expression levels.  
342 Consistent with our previous findings, we observed no effect of PML on the GFP fluorescence



343 intensity following infection of THP-1, Jurkat, HeLa or TE671 cells with our various vectors  
344 (not shown). We conclude that PML does not repress HIV-1 transcription in human cells. This  
345 apparently contradicts a report by Giacca and colleagues that PML inhibits HIV-1 transcription  
346 by directly binding the viral promoter (31). However, the latter study was based on the use of “J-  
347 Lat” clones, which are Jurkat cells in which the HIV-1 provirus has become constitutively  
348 repressed through unknown mechanisms (58). We propose that PML may be involved in the rare  
349 silencing events leading to HIV-1 latency in Jurkat cells, and that PML is important for the  
350 maintenance of silencing; however, PML is not a ubiquitous silencer of HIV-1 transcription.

351 Finally, our study shows that the As<sub>2</sub>O<sub>3</sub>-mediated stimulation of early retroviral infection stages  
352 is completely independent of PML, and so is the inhibition of TRIM5 $\alpha$  by this drug. Our  
353 experimental system was tailored to study the effect of As<sub>2</sub>O<sub>3</sub> on restriction by TRIM5 $\alpha$ , and we  
354 cannot exclude that PML might be involved in other restriction activities known to be  
355 counteracted by As<sub>2</sub>O<sub>3</sub> (50, 51). It is not entirely surprising that As<sub>2</sub>O<sub>3</sub> inhibits TRIM5 $\alpha$  in the  
356 absence of PML, considering that TRIM5 $\alpha$  could target N-MLV in human cells, and HIV-1 in  
357 MEF cells, in the absence of PML. However, these results challenge conclusions from another  
358 paper that used radioactively or chemically labelled arsenate compounds to show that PML was  
359 the main target for this group of pharmacological agents (27). How, then, does As<sub>2</sub>O<sub>3</sub> counteract  
360 TRIM5 $\alpha$  and, to a lesser extent, stimulate HIV-1 and B-MLV vectors in human cells? Perhaps  
361 addressing this long-unanswered question will be helped by an observation that pre-dated the  
362 isolation of TRIM5 $\alpha$ . Indeed, PK11195, a compound which, like As<sub>2</sub>O<sub>3</sub>, affects mitochondrial  
363 functions, also counteracts TRIM5 $\alpha$  (49). Strikingly, these two drugs enhance autophagy (59,  
364 60), an outcome possibly related to their effect on mitochondria. It is possible that As<sub>2</sub>O<sub>3</sub>-

365 induced autophagy accelerates the lysosomal degradation of TRIM5 $\alpha$  and other cytoplasmic  
366 restriction factors.

367

## 368 **Materials and methods**

### 369 **Cell culture**

370 Jurkat and THP-1 cells were maintained in RPMI 1640 medium (HyClone, Thermo Scientific,  
371 USA). Human embryonic kidney (HEK) 293T, HeLa, MEF and TE671 cells were maintained in  
372 Dulbecco's modified Eagle's medium (DMEM; HyClone). All culture media were supplemented  
373 with 10% fetal bovine serum (FBS) and penicillin/streptomycin (HyClone).

### 374 **Plasmids and preparation of retroviral vectors**

375 The pMIP retroviral vector plasmids containing individual isoforms of hPML (pMIP-hPML-I to  
376 VI) and the isoform 2 of mPML (pMIP-mPML) have been described in details in a recent  
377 publication (34) and make use of materials generously provided by Roger D. Everett (61).

378 Retroviral vectors were prepared by co-transfection of 293T cells with pMIP-m(h)PMLs together  
379 with pMD-G and pCL-Eco using polyethylenimine (PEI; Polyscience, Niles, IL) as detailed  
380 previously (34). Virus-containing supernatants were collected 2 d later, clarified by low-speed  
381 centrifugation and kept at -80 °C.

382 To produce GFP-expressing retroviral vectors, 293T cells were seeded in 10 cm culture dishes  
383 and transiently co-transfected with the following plasmids: pMD-G, pCNCG and pCIG3-B or  
384 pCIG3-N to produce B-MLV<sub>GFP</sub> and N-MLV<sub>GFP</sub>, respectively; pMD-G and pHIV-1<sub>NL-GFP</sub> to

385 produce HIV-1<sub>NL-GFP</sub>; pMD-G and pSIV<sub>mac239-GFP</sub> to produce SIV<sub>mac-GFP</sub>; or pONY3.1, pONY8.0  
386 and pMD-G to produce EIAV<sub>GFP</sub> (see (34, 62) and references therein).

### 387 **Design of gRNAs and transduction of lentiviral CRISPR-Cas9 vectors**

388 The lentiviral expression vector plentiCRISPRv2 (pLCv2) was a gift from Feng Zhang (Addgene  
389 plasmid # 52961) and can be used to simultaneously express a gRNA, Cas9 nuclease, and  
390 puromycin resistance, either by transfection or lentiviral transduction (63). Two gRNAs (hPML1  
391 and hPML2) targeting *hPML* (NG\_029036) were designed using the Zhang lab online software  
392 available at [crispr.mit.edu](http://crispr.mit.edu). The sequences targeted are 5'CAATCTGCCGGTACACCGAC  
393 (hPML1) and 5'CACCGGGAAGCTCCTCCTCCGAAGCG (hPML2). A gRNA targeting the  
394 CAG hybrid promoter (target: 5'GTTCCGCGTTACATAACTTA) was used as a negative  
395 control (35). The oligodeoxynucleotides (ODNs) needed for the generation of pLCv2-based  
396 constructs were designed according to the Zhang lab protocol (63, 64) and are shown in Table  
397 S1.

398 The lentiviral vectors were prepared by co-transfection of 293T cells with 10 µg of the  
399 plentiCRISPRv2 construct together with 5 µg of pMD-G and 10 µg of pΔR8.9 (65). The viral  
400 supernatants were collected at 1.5 or 2 d post-transfection and used to transduce various cell  
401 lines. Stably transduced cells were selected by addition of 0.5 µg/ml puromycin (Thermo Fisher  
402 Scientific) to the medium at 2 d post-infection and for 5 d. Control untransduced cells were  
403 killed under these conditions.

### 404 **Surveyor nuclease and TIDE assays**

405 To evaluate on-target modifications (indels) in *hPML*, a surveyor nuclease assay was performed.  
406 293T cells were transfected with either plentiCRISPRv2-hPML1, -hPML2 or -CAG using PEI. 3

407 d later, the genomic DNA was extracted from the transfected cells using the QIAamp DNA mini  
408 kit (Qiagen, CA, USA). Two pairs of primers were designed to amplify 637 bp and 725 bp  
409 fragments on either side of Cas9 targets guided by gPML1 and gPML2 respectively (Fig. 1A).  
410 The sequences of these ODNs are included in Table S1. PCR amplicons were heat-denatured at  
411 95 °C, and re-annealed by slow cooling to promote formation of dsDNA heteroduplexes. The  
412 heteroduplexes were then cleaved by surveyor nuclease S (Integrated DNA Technologies,  
413 Coralville, IA), according to the manufacturer's instructions. Digestion products were visualized  
414 by agarose gel electrophoresis. Amplicons containing the gPML1 target site were obtained from  
415 cells transduced with the lentiviral CRISPR vectors expressing gRNAs targeting hPML1 or  
416 CAG, using the WT/indel ODN pairs (see Table). These amplicons were Sanger sequenced using  
417 the WT/indel fwd ODN. A ~175-nt long fragment of the sequencing data was then fed into the  
418 online TIDE assay that quantitates the % of indels by sequencing decomposition, in comparison  
419 with the unedited control (66).

## 420 **Construction of the homology directed repair (HDR) plasmid and generation of PML-KO** 421 **Jurkat cells**

422 We used pcDNA3.1+ as the backbone plasmid to prepare a HDR “donor” plasmid containing a  
423 neomycin selection gene (Neo<sup>R</sup>). First, the backbone plasmid was cut with BamHI and BglII,  
424 then self-ligated in order to remove the cytomegalovirus promoter from upstream of the  
425 multicloning site MCS1. Next, two ODNs were designed to introduce the second MCS (MCS2)  
426 (see Table S1); these ODNs were annealed, and the resulting duplex ligated into the PciI cut site  
427 of the plasmid, downstream of Neo<sup>R</sup>, yielding pNMs-Neo.HDR. To construct the PML HDR  
428 plasmid, homology arms corresponding to 800 bp-long regions immediately upstream and  
429 downstream of the hPML gRNA1-mediated Cas9 cut site in *hPML* were designed. The arms

430 were amplified by PCR from genomic DNA extracted from 293T cells using the QIAamp DNA  
431 mini kit (Qiagen). The sequences of ODNs used in the PCR reactions are provided in Table S1.  
432 The 5' arm was cloned into MCS1 of pNMs-Neo.HDR which had been cut with NotI and XbaI.  
433 The plasmid was then cut with Mfe I and Sbf I in order to clone the 3' arm into MCS2, yielding  
434 pNMs-Neo.HDR-hPML.

435 Jurkat cells (300,000) were electroporated with 1.5  $\mu$ g of pNMs-Neo.HDR-hPML together with  
436 1.5  $\mu$ g of pLCv2-hPML1 using an MP-100 microporator (Digital Bio Technology) according to  
437 the manufacturer's instructions. The parameters were 1300 V, 2 pulses, 20 ms. 48 h later, cells  
438 were placed in medium containing 1 mg/ml G418, and selection was carried out for 7 d.

439 **Antibodies and WB analyses.** Cells ( $1 \times 10^6$ ) were lysed at 4°C in RIPA lysis buffer (1% NP40,  
440 0.5% deoxycholate, 0.1% SDS, 150mM NaCl, 50 mM Tris-HCl pH 8.0). The lysates were  
441 subjected to SDS-polyacrylamide gel electrophoresis, followed by WB analysis using mouse  
442 anti-mPML mAb (36-1-104, Enzo life sciences, NY), rabbit polyclonal anti-hPML (A301-167A,  
443 Bethyl Laboratories, TX), rabbit polyclonal anti-FLAG (Cell Signaling, MA, USA), or mouse  
444 anti- $\beta$ -actin antibody (Sigma, MI).

445 **Viral challenges and flow cytometric analysis.** Cells were seeded into 24-well plates at  $3 \times 10^4$   
446 cells/well and infected the following day with GFP-expressing retroviral vectors. HeLa and  
447 TE671 cells were trypsinized at 2 d post-infection and fixed in 3% formaldehyde (Fisher  
448 Scientific, MA, USA). The percentage of GFP-positive cells was then determined by analyzing  
449  $1 \times 10^4$  to  $5 \times 10^4$  cells on a FC500 MPL cytometer (Beckman Coulter, CA, USA) using the CXP  
450 Software (Beckman Coulter). All infection experiments were performed twice with identical  
451 results. One of two experiments is shown.

452 **Pharmacological treatments.** A 0.1 M stock solution of As<sub>2</sub>O<sub>3</sub> (Sigma) was prepared in 1 N  
453 NaOH, as previously described (28), and diluted in the culture medium immediately before use.  
454 Cells were treated for 15 min prior to infection. 16 h post-infection, the supernatants were  
455 replaced with fresh medium devoid of drug. Recombinant human IFN- $\alpha$  was obtained from  
456 Shenandoah biotechnology (Warwick, PA). Recombinant human IFN- $\beta$  and IFN- $\omega$  were  
457 obtained from PeproTech (Rocky Hill, NJ). IFN-I was added to cell cultures 16 h prior to  
458 infection and at a final concentration of 10 ng/ml.

459 **Immunofluorescence microscopy.** HeLa or MEF cells were seeded on glass coverslips placed  
460 in 3.5-cm wells. MEFs were treated with LMB (20 ng/ml) 3 h prior to infection then infected for  
461 6 h with HIV-1<sub>NL-GFP</sub>. The cells were permeabilized and fixed for 10 min in Triton X-100/4%  
462 formaldehyde at room temperature (RT), followed by 4 washes with PBS. Cells were then  
463 treated with 10% goat serum (Sigma) for 30 min at RT followed by 4 h of incubation with  
464 antibodies against FLAG (Sigma, 1:150), hPML (Bethyl Laboratories, 1:150) or mPML (Enzo  
465 Life Sciences, 1:150) in 10% goat serum at RT. They were then washed 4 times with PBS and  
466 fluorescently stained with Alexa Fluor 488-conjugated goat anti-mouse or 594-conjugated goat  
467 anti-rabbit (Molecular Probes, Eugene, OR) diluted 1:100 in 10% goat serum for 1 h at RT. The  
468 cells were then washed 4 times with PBS before mounting in Vectashield (Vector Laboratories,  
469 Peterborough, UK). Hoechst 33342 (0.8  $\mu$ g/ml; Molecular Probes) was added along with the  
470 penultimate PBS wash to reveal DNA. Images were acquired on an AxioObserver Microscope  
471 (Carl Zeiss Canada, Toronto, ON) equipped with the Apotome module.

472

473 **Acknowledgements**

474 We thank Feng Zhang and Roger D. Everett for sharing reagents. This research received no  
475 specific grant from any funding agency in the public, commercial, or not-for-profit sectors.

476

## 477 **References**

- 478 1. Reymond A, Meroni G, Fantozzi A, Merla G, Cairo S, Luzi L, Riganelli D, Zanaria E, Messali S,  
479 Cainarca S, Guffanti A, Minucci S, Pelicci PG, Ballabio A. 2001. The tripartite motif family  
480 identifies cell compartments. *Embo J* 20:2140-51.
- 481 2. Jensen K, Shiels C, Freemont PS. 2001. PML protein isoforms and the RBCC/TRIM motif.  
482 *Oncogene* 20:7223-33.
- 483 3. Grotzinger T, Sternsdorf T, Jensen K, Will H. 1996. Interferon-modulated expression of genes  
484 encoding the nuclear-dot-associated proteins Sp100 and promyelocytic leukemia protein (PML).  
485 *Eur J Biochem* 238:554-60.
- 486 4. Shimoda K, Kamesaki K, Numata A, Aoki K, Matsuda T, Oritani K, Tamiya S, Kato K, Takase K,  
487 Imamura R, Yamamoto T, Miyamoto T, Nagafuji K, Gondo H, Nagafuchi S, Nakayama K, Harada  
488 M. 2002. Cutting edge: tyk2 is required for the induction and nuclear translocation of Daxx  
489 which regulates IFN-alpha-induced suppression of B lymphocyte formation. *J Immunol*  
490 169:4707-11.
- 491 5. Bernardi R, Pandolfi PP. 2007. Structure, dynamics and functions of promyelocytic leukaemia  
492 nuclear bodies. *Nat Rev Mol Cell Biol* 8:1006-16.
- 493 6. Negorev D, Maul GG. 2001. Cellular proteins localized at and interacting within ND10/PML  
494 nuclear bodies/PODs suggest functions of a nuclear depot. *Oncogene* 20:7234-42.
- 495 7. Stremlau M, Owens CM, Perron MJ, Kiessling M, Autissier P, Sodroski J. 2004. The cytoplasmic  
496 body component TRIM5[alpha] restricts HIV-1 infection in Old World monkeys. *Nature* 427:848-  
497 853.
- 498 8. Diaz-Griffero F, Gallo DE, Hope TJ, Sodroski J. 2011. Trafficking of some old world primate  
499 TRIM5 $\alpha$  proteins through the nucleus. *Retrovirology* 8:38.
- 500 9. Lallemand-Breitenbach V, de The H. 2010. PML nuclear bodies. *Cold Spring Harb Perspect Biol*  
501 2:a000661.
- 502 10. Salomoni P, Pandolfi PP. 2002. The role of PML in tumor suppression. *Cell* 108:165-70.
- 503 11. Samuel CE. 2001. Antiviral actions of interferons. *Clin Microbiol Rev* 14:778-809, table of  
504 contents.
- 505 12. Stark GR, Kerr IM, Williams BR, Silverman RH, Schreiber RD. 1998. How cells respond to  
506 interferons. *Annu Rev Biochem* 67:227-64.
- 507 13. Roberts RM, Liu L, Guo Q, Leaman D, Bixby J. 1998. The evolution of the type I interferons. *J*  
508 *Interferon Cytokine Res* 18:805-16.
- 509 14. Samuel CE. 1991. Antiviral actions of interferon. Interferon-regulated cellular proteins and their  
510 surprisingly selective antiviral activities. *Virology* 183:1-11.
- 511 15. Carthagena L, Bergamaschi A, Luna JM, David A, Uchil PD, Margottin-Goguet F, Mothes W,  
512 Hazan U, Transy C, Pancino G, Nisole S. 2009. Human TRIM Gene Expression in Response to  
513 Interferons. *PLoS ONE* 4:e4894.
- 514 16. Everett RD, Chelbi-Alix MK. 2007. PML and PML nuclear bodies: implications in antiviral defence.  
515 *Biochimie* 89:819-30.
- 516 17. Kim YE, Ahn JH. 2015. Positive role of promyelocytic leukemia protein in type I interferon  
517 response and its regulation by human cytomegalovirus. *PLoS Pathog* 11:e1004785.
- 518 18. Regad T, Saib A, Lallemand-Breitenbach V, Pandolfi PP, de The H, Chelbi-Alix MK. 2001. PML  
519 mediates the interferon-induced antiviral state against a complex retrovirus via its association  
520 with the viral transactivator. *EMBO J* 20:3495-505.



- 521 19. Blondel D, Regad T, Poisson N, Pavie B, Harper F, Pandolfi PP, De The H, Chelbi-Alix MK. 2002.  
522 Rabies virus P and small P products interact directly with PML and reorganize PML nuclear  
523 bodies. *Oncogene* 21:7957-70.
- 524 20. Pampin M, Simonin Y, Blondel B, Percherancier Y, Chelbi-Alix MK. 2006. Cross talk between PML  
525 and p53 during poliovirus infection: implications for antiviral defense. *J Virol* 80:8582-92.
- 526 21. Maroui MA, Pampin M, Chelbi-Alix MK. 2011. Promyelocytic leukemia isoform IV confers  
527 resistance to encephalomyocarditis virus via the sequestration of 3D polymerase in nuclear  
528 bodies. *J Virol* 85:13164-73.
- 529 22. Mitchell AM, Hirsch ML, Li C, Samulski RJ. 2014. Promyelocytic leukemia protein is a cell-intrinsic  
530 factor inhibiting parvovirus DNA replication. *J Virol* 88:925-36.
- 531 23. Chelbi-Alix MK, Quignon F, Pelicano L, Koken MH, de The H. 1998. Resistance to virus infection  
532 conferred by the interferon-induced promyelocytic leukemia protein. *J Virol* 72:1043-51.
- 533 24. Maul GG, Everett RD. 1994. The nuclear location of PML, a cellular member of the C3HC4 zinc-  
534 binding domain protein family, is rearranged during herpes simplex virus infection by the C3HC4  
535 viral protein ICP0. *J Gen Virol* 75 ( Pt 6):1223-33.
- 536 25. Saffert RT, Kalejta RF. 2006. Inactivating a cellular intrinsic immune defense mediated by Daxx is  
537 the mechanism through which the human cytomegalovirus pp71 protein stimulates viral  
538 immediate-early gene expression. *J Virol* 80:3863-71.
- 539 26. Woodhall DL, Groves IJ, Reeves MB, Wilkinson G, Sinclair JH. 2006. Human Daxx-mediated  
540 repression of human cytomegalovirus gene expression correlates with a repressive chromatin  
541 structure around the major immediate early promoter. *J Biol Chem* 281:37652-60.
- 542 27. Zhang XW, Yan XJ, Zhou ZR, Yang FF, Wu ZY, Sun HB, Liang WX, Song AX, Lallemand-Breitenbach  
543 V, Jeanne M, Zhang QY, Yang HY, Huang QH, Zhou GB, Tong JH, Zhang Y, Wu JH, Hu HY, de The  
544 H, Chen SJ, Chen Z. 2010. Arsenic trioxide controls the fate of the PML-RARalpha oncoprotein by  
545 directly binding PML. *Science* 328:240-3.
- 546 28. Berthoux L, Towers GJ, Gurer C, Salomoni P, Pandolfi PP, Luban J. 2003. As2O3 Enhances  
547 Retroviral Reverse Transcription and Counteracts Ref1 Antiviral Activity. *Journal of Virology*  
548 77:3167-3180.
- 549 29. Dutrieux J, Maarifi G, Portilho DM, Arhel NJ, Chelbi-Alix MK, Nisole S. 2015. PML/TRIM19-  
550 Dependent Inhibition of Retroviral Reverse-Transcription by Daxx. *PLoS Pathog* 11:e1005280.
- 551 30. Kahle T, Volkmann B, Eissmann K, Herrmann A, Schmitt S, Wittmann S, Merkel L, Reuter N,  
552 Stamminger T, Gramberg T. 2016. TRIM19/PML Restricts HIV Infection in a Cell Type-Dependent  
553 Manner. *Viruses* 8.
- 554 31. Lusic M, Marini B, Ali H, Lucic B, Luzzati R, Giacca M. 2013. Proximity to PML nuclear bodies  
555 regulates HIV-1 latency in CD4+ T cells. *Cell Host Microbe* 13:665-77.
- 556 32. Kahle T, Volkmann B, Eissmann K, Herrmann A, Schmitt S, Wittmann S, Merkel L, Reuter N,  
557 Stamminger T, Gramberg T. 2015. TRIM19/PML Restricts HIV Infection in a Cell Type-Dependent  
558 Manner. *Viruses* 8.
- 559 33. Dutrieux J, Maarifi G, Portilho DM, Arhel NJ, Chelbi-Alix MK, Nisole S. 2015. PML/TRIM19-  
560 Dependent Inhibition of Retroviral Reverse-Transcription by Daxx. *PLoS pathogens* 11:e1005280.
- 561 34. Masroori N, Merindol N, Berthoux L. 2016. The interferon-induced antiviral protein PML  
562 (TRIM19) promotes the restriction and transcriptional silencing of lentiviruses in a context-  
563 specific, isoform-specific fashion. *Retrovirology* 13:19.
- 564 35. Kearns NA, Genga RM, Enameh MS, Garber M, Wolfe SA, Maehr R. 2014. Cas9 effector-  
565 mediated regulation of transcription and differentiation in human pluripotent stem cells.  
566 *Development* 141:219-23.
- 567 36. Qiu P, Shandilya H, D'Alessio JM, O'Connor K, Durocher J, Gerard GF. 2004. Mutation detection  
568 using Surveyor nuclease. *Biotechniques* 36:702-7.

- 569 37. He J, Chen Y, Farzan M, Choe H, Ohagen A, Gartner S, Busciglio J, Yang X, Hofmann W, Newman  
570 W, Mackay CR, Sodroski J, Gabuzda D. 1997. CCR3 and CCR5 are co-receptors for HIV-1 infection  
571 of microglia. *Nature* 385:645-9.
- 572 38. Kim YE, Ahn JH. 2015. Positive role of promyelocytic leukemia protein in type I interferon  
573 response and its regulation by human cytomegalovirus. *PLoS pathogens* 11:e1004785.
- 574 39. Keckesova Z, Ylinen LM, Towers GJ. 2004. The human and African green monkey TRIM5alpha  
575 genes encode Ref1 and Lv1 retroviral restriction factor activities. *Proc Natl Acad Sci U S A*  
576 101:10780-5.
- 577 40. Plourde MB, Morchid A, Iranzereza L, Berthoux L. 2013. The Bcl-2/Bcl-xL inhibitor BH31-2'  
578 affects the dynamics and subcellular localization of sumoylated proteins. *Int J Biochem Cell Biol*  
579 45:826-35.
- 580 41. Paquet D, Kwart D, Chen A, Sproul A, Jacob S, Teo S, Olsen KM, Gregg A, Noggle S, Tessier-  
581 Lavigne M. 2016. Efficient introduction of specific homozygous and heterozygous mutations  
582 using CRISPR/Cas9. *Nature* 533:125-9.
- 583 42. Carthagena L, Parise MC, Ringeard M, Chelbi-Alix MK, Hazan U, Nisole S. 2008. Implication of  
584 TRIM alpha and TRIMCyp in interferon-induced anti-retroviral restriction activities. *Retrovirology*  
585 5:59.
- 586 43. Diaz-Griffero F, Gallo DE, Hope TJ, Sodroski J. 2011. Trafficking of some old world primate  
587 TRIM5alpha proteins through the nucleus. *Retrovirology* 8:38.
- 588 44. Pham QT, Bouchard A, Grutter MG, Berthoux L. 2010. Generation of human TRIM5alpha  
589 mutants with high HIV-1 restriction activity. *Gene Ther* 17:859-71.
- 590 45. Hatziioannou T, Perez-Caballero D, Yang A, Cowan S, Bieniasz PD. 2004. Retrovirus resistance  
591 factors Ref1 and Lv1 are species-specific variants of TRIM5alpha. *Proc Natl Acad Sci U S A*  
592 101:10774-9.
- 593 46. Berthoux L, Towers GJ, Gurer C, Salomoni P, Pandolfi PP, Luban J. 2003. As(2)O(3) enhances  
594 retroviral reverse transcription and counteracts Ref1 antiviral activity. *J Virol* 77:3167-80.
- 595 47. Sebastian S, Sokolskaja E, Luban J. 2006. Arsenic counteracts human immunodeficiency virus  
596 type 1 restriction by various TRIM5 orthologues in a cell type-dependent manner. *J Virol*  
597 80:2051-4.
- 598 48. Jeanne M, Lallemand-Breitenbach V, Ferhi O, Koken M, Le Bras M, Duffort S, Peres L, Berthier C,  
599 Soilihi H, Raught B, de The H. 2010. PML/RARA oxidation and arsenic binding initiate the  
600 antileukemia response of As2O3. *Cancer Cell* 18:88-98.
- 601 49. Berthoux L, Sebastian S, Sokolskaja E, Luban J. 2004. Lv1 inhibition of human immunodeficiency  
602 virus type 1 is counteracted by factors that stimulate synthesis or nuclear translocation of viral  
603 cDNA. *J Virol* 78:11739-50.
- 604 50. Pacheco B, Menendez-Arias L, Sodroski J. 2016. Characterization of two distinct early post-entry  
605 blocks to HIV-1 in common marmoset lymphocytes. *Sci Rep* 6:37489.
- 606 51. Pizzato M, McCauley SM, Neagu MR, Pertel T, Firrito C, Ziglio S, Dauphin A, Zufferey M, Berthoux  
607 L, Luban J. 2015. Lv4 Is a Capsid-Specific Antiviral Activity in Human Blood Cells That Restricts  
608 Viruses of the SIVMAC/SIVSM/HIV-2 Lineage Prior to Integration. *PLoS pathogens* 11:e1005050.
- 609 52. Wang ZG, Ruggero D, Ronchetti S, Zhong S, Gaboli M, Rivi R, Pandolfi PP. 1998. PML is essential  
610 for multiple apoptotic pathways. *Nat Genet* 20:266-72.
- 611 53. Nepveu-Traversy ME, demogines A, Fricke T, Plourde MB, Riopel K, Veillette M, diaz-Griffero F,  
612 Sawyer SL, Berthoux L. 2016. A putative SUMO interacting motif in the B30.2/SPRY domain of  
613 rhesus macaque TRIM5α important for NF-κB/AP-1 signaling and HIV-1 restriction. *Heliyon*  
614 2:e00056.

- 615 54. Ylinen LM, Keckesova Z, Wilson SJ, Ranasinghe S, Towers GJ. 2005. Differential restriction of  
616 human immunodeficiency virus type 2 and simian immunodeficiency virus SIVmac by  
617 TRIM5alpha alleles. *J Virol* 79:11580-7.
- 618 55. Turelli P, Doucas V, Craig E, Mangeat B, Klages N, Evans R, Kalpana G, Trono D. 2001.  
619 Cytoplasmic recruitment of INI1 and PML on incoming HIV preintegration complexes:  
620 interference with early steps of viral replication. *Mol Cell* 7:1245-54.
- 621 56. Bell P, Montaner LJ, Maul GG. 2001. Accumulation and intranuclear distribution of unintegrated  
622 human immunodeficiency virus type 1 DNA. *J Virol* 75:7683-91.
- 623 57. Neil SJ, Zang T, Bieniasz PD. 2008. Tetherin inhibits retrovirus release and is antagonized by HIV-  
624 1 Vpu. *Nature* 451:425-30.
- 625 58. Jordan A, Bisgrove D, Verdin E. 2003. HIV reproducibly establishes a latent infection after acute  
626 infection of T cells in vitro. *EMBO J* 22:1868-77.
- 627 59. Gonzalez-Polo RA, Carvalho G, Braun T, Decaudin D, Fabre C, Larochette N, Perfettini JL,  
628 Djavaheri-Mergny M, Youlyouz-Marfak I, Codogno P, Raphael M, Feuillard J, Kroemer G. 2005.  
629 PK11195 potently sensitizes to apoptosis induction independently from the peripheral  
630 benzodiazepin receptor. *Oncogene* 24:7503-13.
- 631 60. Azad MB, Chen Y, Gibson SB. 2009. Regulation of autophagy by reactive oxygen species (ROS):  
632 implications for cancer progression and treatment. *Antioxid Redox Signal* 11:777-90.
- 633 61. Cuchet D, Sykes A, Nicolas A, Orr A, Murray J, Sirma H, Heeren J, Bartelt A, Everett RD. 2011.  
634 PML isoforms I and II participate in PML-dependent restriction of HSV-1 replication. *J Cell Sci*  
635 124:280-91.
- 636 62. Berthoux L, Sebastian S, Sokolskaja E, Luban J. 2005. Cyclophilin A is required for TRIM5{alpha}-  
637 mediated resistance to HIV-1 in Old World monkey cells. *Proc Natl Acad Sci U S A* 102:14849-53.
- 638 63. Sanjana NE, Shalem O, Zhang F. 2014. Improved vectors and genome-wide libraries for CRISPR  
639 screening. *Nat Methods* 11:783-4.
- 640 64. Shalem O, Sanjana NE, Hartenian E, Shi X, Scott DA, Mikkelsen TS, Heckl D, Ebert BL, Root DE,  
641 Doench JG, Zhang F. 2014. Genome-scale CRISPR-Cas9 knockout screening in human cells.  
642 *Science* 343:84-7.
- 643 65. Zufferey R, Nagy D, Mandel RJ, Naldini L, Trono D. 1997. Multiply attenuated lentiviral vector  
644 achieves efficient gene delivery in vivo. *Nat Biotechnol* 15:871-5.
- 645 66. Brinkman EK, Chen T, Amendola M, van Steensel B. 2014. Easy quantitative assessment of  
646 genome editing by sequence trace decomposition. *Nucleic acids research* 42:e168.

647

648

649

650 **FIG 1** CRISPR/Cas9-mediated genome editing of PML in human cell lines. (A) The Cas9  
651 nuclease was targeted to exon 2 of the PML gene (green) by two selected gRNAs whose binding  
652 sites are shown in blue (PAM motifs are in red). Arrows indicate the positions of the binding  
653 sites for the ODNs used in the PCR-Surveyor assay (blue arrows for gRNA1-, red arrows for  
654 gRNA2-guided cut sites). The Surveyor assay is shown in the lower panel. Briefly, PCR  
655 products amplified from cells transfected with pLCv2-hPML1, -hPML2, or pLCv2-CAG (Ctrl),  
656 were subjected to denaturation, re-annealing and digestion with the Surveyor enzyme.  
657 Arrowheads indicate cleavage products of the expected size. (B) Sanger sequencing analysis of  
658 *PML* in cells transduced with LCv2-hPML1. THP-1 cells were transduced with lentiviral vectors  
659 produced using pLCv2-hPML1 or the control pLCv2-CAG. Following puromycin selection, the  
660 targeted *PML* locus was PCR-amplified and the PCR product was Sanger sequenced. The figure  
661 shows an alignment of the obtained sequence plots. (C) Decomposition of sequencing plots by  
662 TIDE assay. The graph shows the % of aberrant peaks upstream and downstream of the cut site  
663 in the sequencing reactions shown in panel B. The % of indel-containing alleles was computed  
664 by TIDE.

665 **FIG 2** PML knockout has negligible effects on intrinsic or IFN-I-induced restriction of  
666 retroviruses in THP-1 cells. (A) WB analysis of THP-1 cells transduced with pLCv2-based  
667 vectors expressing Cas9 and a gRNA targeting either hPML or CAG. Stably transduced,  
668 puromycin-resistant cells were treated with IFN- $\beta$  (10 ng/ml). Cellular lysates were prepared 16  
669 h later and analyzed by WB using antibodies against hPML and actin as a loading control. (B)  
670 FACS plots from PML-knockout (KO) and control (Ctrl, CAG gRNA-transduced) THP-1 cells  
671 infected with HIV-1<sub>NL-GFP</sub>. Control or PML-KO THP-1 cells were treated with IFN- $\beta$  or left  
672 untreated and then exposed to HIV-1<sub>NL-GFP</sub> (10  $\mu$ l). 2 d later, cells were analyzed by FACS and

673 the percentage of infected (GFP-positive) cells observed is indicated on each plot. (C) Virus  
674 dose-dependent analysis of the role of hPML in the intrinsic and IFN-I-induced restriction of  
675 retroviruses. Control and PML-KO THP-1 cells were treated with IFN- $\beta$  (10 ng/ml) for 16 h,  
676 followed by infection with increasing doses of retroviral vectors. The percentage of infected cells  
677 was assessed 2 d later by FACS.

678 **FIG 3** PML knockout has no effect on intrinsic or IFN-I-induced restriction of retroviruses in  
679 HeLa cells. (A) HeLa cells lentivirally transduced with pLCv2 vectors expressing either the  
680 hPML gRNA1 or (as a control) the CAG-targeting gRNA were treated with IFN- $\beta$  (10 ng/ml).  
681 Cellular lysates were prepared 16 h later and analyzed by WB using an anti-hPML antibody.  
682 Actin was analyzed as a loading control. (B) IF microscopy analysis of PML bodies in HeLa  
683 cells transduced with LCv2-PML1 (PML-KO) or transduced with LCv2-CAG as a control (Ctrl).  
684 Puromycin-selected cells were stained for PML (top) or SUMO-1 (bottom). Nuclei were stained  
685 with Hoechst33342. (C) FACS plots from transduced HeLa cells infected with HIV-1<sub>NL-GFP</sub>.  
686 Control and PML-KO HeLa cells treated or not with IFN- $\beta$  were infected with HIV-1<sub>NL-GFP</sub> (6  
687  $\mu$ l). The percentage of infected cells determined at 2 d post-infection is indicated for each plot.  
688 (D) Virus dose-dependent analysis of the role of hPML in IFN-I-induced restriction of retroviral  
689 infection. Control and PML-KO HeLa cells were treated with IFN- $\beta$ , followed 16 h later by  
690 infection with increasing doses of the indicated retroviral vectors. The percentage of infected  
691 cells was assessed 2 d later by FACS.

692 **FIG 4** PML knockout has no effect on intrinsic or IFN-I-induced restriction of HIV-1 in TE671  
693 cells. (A) WB analysis. TE671 cells were stably transduced with pLCv2-based vectors  
694 expressing Cas9 and either the hPML-targeting gRNA1 or the CAG-targeting gRNA as a  
695 control. The cells were treated with IFN- $\beta$  (10 ng/ml) or left untreated as a control. Cellular

696 lysates were prepared 16 h later and analyzed by WB using an anti-hPML antibody along with  
697 actin as a loading control. (B) Infection assay. Control (CAG gRNA-transduced) and PML-KO  
698 TE671 cells were treated with IFN- $\beta$  or left untreated. 16 h later, the cells were infected with  
699 increasing doses of the indicated retroviral vectors. The percentage of infected cells was assessed  
700 2 d later by FACS.

701 **FIG 5** HDR-mediated knockout of PML. (A) Schematic of the HDR plasmid and targeting  
702 strategy for the knock-in of the Neomycin resistance gene at the PML locus. Two 800 bp-long  
703 PML homology arms encompass the Neo<sup>R</sup> expression cassette on plasmid pNMs-Neo.HDR-  
704 hPML. The arms are complementary to the PML regions on either side of the gRNA1-mediated  
705 Cas9 cleavage site. Co-transfection of pLCv2-hPML1 and pNMs-Neo.HDR-hPML may yield a  
706 knock-in allele as indicated if DNA is repaired by HDR. If DNA is repaired by NHEJ, WT or  
707 indel-containing alleles may be generated. Yellow and orange arrows indicate the binding sites  
708 for the primers used to detect knock-in and WT/indel alleles by PCR (1 Kbp and 0.3 Kbp  
709 products, respectively). (B) PCR analysis of Neomycin-resistant TE671 clones. TE671 cells were  
710 co-transfected with pLCv2-hPML1 and pNMs-Neo.HDR-hPML, then grown in presence of  
711 neomycin. Individual Neo<sup>R</sup> clones were analyzed using the two primer pairs described in A.

712 **FIG 6** PML knockout has virus-specific effects on the restriction of retroviruses in Jurkat cells.  
713 (A) Jurkat cells were co-transfected with pLCv2.hPML1 and pNMs-Neo.HDR-hPML.  
714 Neomycin-resistant cells (KO) and parental untransfected cells (WT) were treated with IFN- $\alpha$ ,  
715 IFN- $\beta$  or IFN- $\omega$  (10 ng/ml). Cellular lysates were prepared 16 h later and analyzed by WB using  
716 an anti-hPML antibody. Actin was analyzed as a loading control. (B) Virus dose-dependent  
717 analysis of the role of hPML in the intrinsic and IFN-I-induced restriction of retroviruses. PML-  
718 KO and control Jurkat cells were treated with IFN- $\beta$  for 16 h, followed by infection with

719 increasing doses of the indicated retroviral vectors. The percentage of infected cells was assessed  
720 2 d later by FACS. (C) PML-KO and control cells were challenged with increasing doses of  
721 HIV-1<sub>NL-GFP</sub> following treatment with IFN- $\alpha$ , - $\beta$  or - $\omega$  for 16 h. The percentage of infected cells  
722 was assessed 2 d later by FACS.

723 **FIG 7** Transduction of mPML or hPML isoforms in PML-KO Jurkat cells has virus-specific  
724 effects on the permissiveness to retroviral vectors. (A) WB analysis of mPML and hPML  
725 expression. PML-KO Jurkat cells were stably transduced with mPML or with FLAG-tagged  
726 hPML-I to -VI separately. The empty vector (EV) was transduced as a control. Lysates prepared  
727 from the different cell populations were analyzed by WB with anti-FLAG (left panel) or anti-  
728 mPML (right panel) antibodies. Actin was probed as loading control. The arrowheads indicate  
729 the expected size for each hPML isoform. (B) Susceptibility to transduction by retroviral  
730 vectors. The cells were infected with multiple doses of the indicated retroviral vectors and the  
731 percentage of GFP-expressing cells was determined 2 d later by FACS.

732 **FIG 8** PML is irrelevant for the As<sub>2</sub>O<sub>3</sub>-induced stimulation of retroviral infectivity in human  
733 cells. (A) Effect of As<sub>2</sub>O<sub>3</sub> on the permissiveness to retroviral vectors in the presence or absence  
734 of PML. Control and PML-KO human cell lines were treated with the indicated amounts of  
735 As<sub>2</sub>O<sub>3</sub> for 15 min prior to infection with HIV-1, B-MLV and N-MLV vectors expressing GFP  
736 (B-MLV<sub>GFP</sub> and N-MLV<sub>GFP</sub> have identical titers in non-restrictive CRFK cat cells). The  
737 percentage of infected cells was assessed 2 d later by FACS. The values represent the means of  
738 three independent infections with standard deviations (N/D, not detected). Statistical significance  
739 was analyzed used a two-tailed Student's t-test (\*\*P<0.01, \*\*\*P<0.001). (B) Virus dose-  
740 dependent infections. Ctrl and PML-KO HeLa cells were infected with increasing doses of B-

741 MLV<sub>GFP</sub> or N-MLV<sub>GFP</sub> vectors in the presence or not of 4 μM As<sub>2</sub>O<sub>3</sub>. 2 d later, the percentage of  
742 infected cells was determined with FACS.

743 **FIG 9** PML is not required for the TRIM5α-mediated restriction of HIV-1 in MEFs. (A) WB  
744 analysis of WT and mutant TRIM5α. MEFs were transduced with retroviral vectors expressing  
745 WT and C35A variants of FLAG-tagged rhTRIM5α and hTRIM5α. Following puromycin  
746 selection, cell lysates were prepared from the various cell populations transduced with the  
747 indicated vectors or transduced with the empty vector (EV) as a control. TRIM5α was detected  
748 using an antibody against FLAG, with actin used as a loading control. (B) Immunofluorescence  
749 staining of mPML and rhTRIM5α in WT MEFs stably transduced with FLAG-tagged  
750 rhTRIM5α. The cells were treated with either LMB (20 ng/ml) or PBS as a control, 3 h prior to  
751 infection with HIV-1<sub>NL-GFP</sub> at a viral dose leading to approximately 10% infected cells. 6 h later,  
752 the cells were analyzed by immunofluorescence microscopy using anti-FLAG (red) and anti-  
753 mPML (green) antibodies. Nuclear DNA was stained using Hoechst 33342 (blue). Images are  
754 representative of multiple observations. Scale bar, 5 μm. (C) rhTRIM5α restricts HIV-1 in the  
755 presence or absence of PML. PML-KO or WT MEFs stably transduced with rhTRIM5α or  
756 huTRIM5α (WT or C35A mutant) were infected with HIV-1<sub>NL-GFP</sub> or SIV<sub>mac-GFP</sub>, using virus  
757 amounts leading to infection of about 10% of the parental cells. 2 d later, the percentage of  
758 infected cells was measured by FACS. The values represent the means of three independent  
759 infections with standard deviations.

760

761 **Table 1** Sequence of ODNs used in this study.

762



| Name               | Sequence                           |
|--------------------|------------------------------------|
| PML gRNA1 top      | 5'CACCGCAATCTGCCGGTACACCGAC        |
| PML gRNA1 bottom   | 5'AAACGTCGGTGTACCGGCAGATTGC        |
| PML gRNA2 top      | 5'CACCGGGAACCTCCTCCTCCGAAGCG       |
| PML gRNA2 bottom   | 5'AAACCGCTTCGGAGGAGGAGTTCCC        |
| CAG gRNA top       | 5'CACCGGTTCCGCGTTACATAACTTA        |
| CAG gRNA bottom    | 5'AAACTAAGTTATGTAACGCGGAACC        |
| Surveyor gRNA1 fwd | 5'AATGGGGGTATTGGGGTGCTG            |
| Surveyor gRNA1 rev | 5'TGGTCAGCGTAGGGGTGC               |
| Surveyor gRNA2 fwd | 5'AAGAGTGGAATTTCTGGGTC             |
| Surveyor gRNA2 rev | 5'GAAGCACTTGGCGCAGAGG              |
| PML 5'arm fwd      | 5'CTAGCGGCCGCATTTTCAATTTCTTTCTAAC  |
| PML 5'arm rev      | 5'AATTCTAGAGCCGCTGCAGACTCTC        |
| PML 3'arm fwd      | 5'TTACAATTGGGCTGTGTGCACCC          |
| PML 3'arm rev      | 5'CGCCCTGCAGGCTGTACGAATGTATTAC     |
| MCS2 top           | 5'CATGGCAATTGAAGCTTCCTGCAGGGGATCCA |
| MCS2 bottom        | 5'CATGTGGATCCCCTGCAGGAAGCTTCAATTGC |
| Knock-in fwd       | 5'TCTGGACGAAGAGCATCAGG             |
| Knock-in rev       | 5'GATTGCACTCTCTCTCTCCTC            |
| WT/indel fwd       | 5'ACACGCTGTGCTCAGGATGC             |
| WT/indel rev       | 5'GTTGCGCAGCTCTGCTAGG              |

763

764

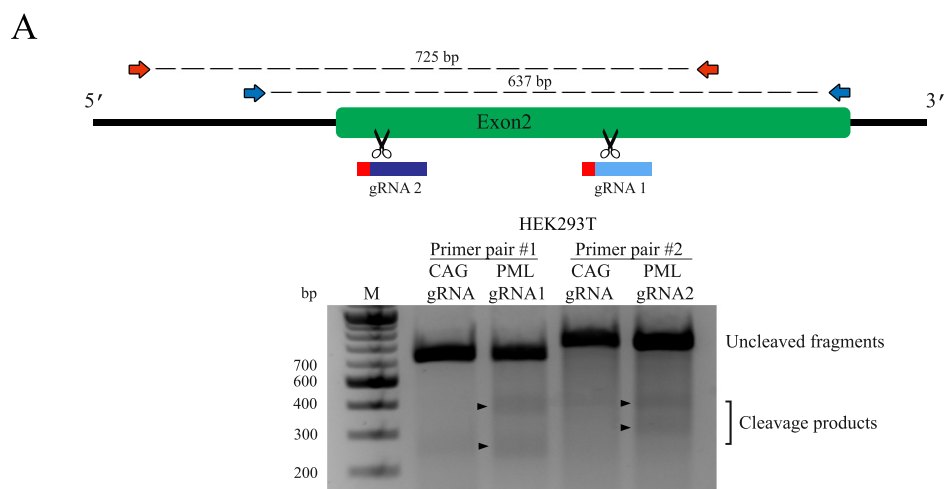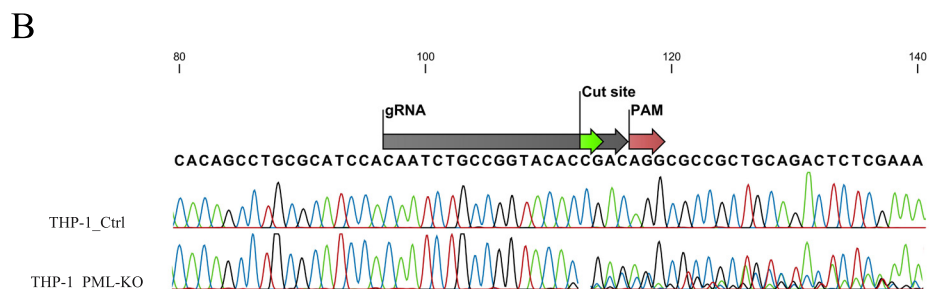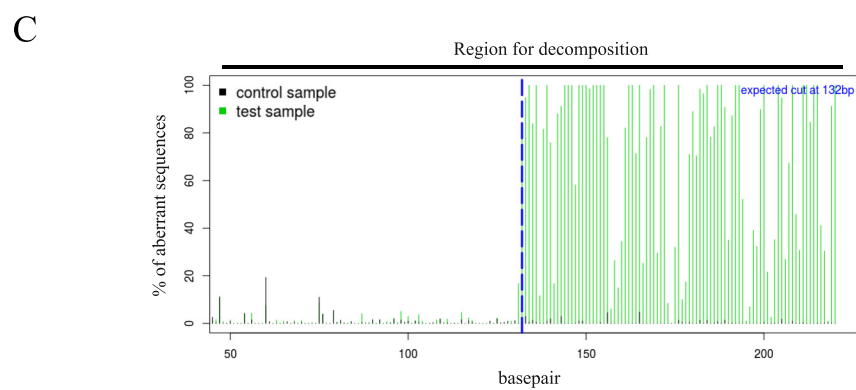

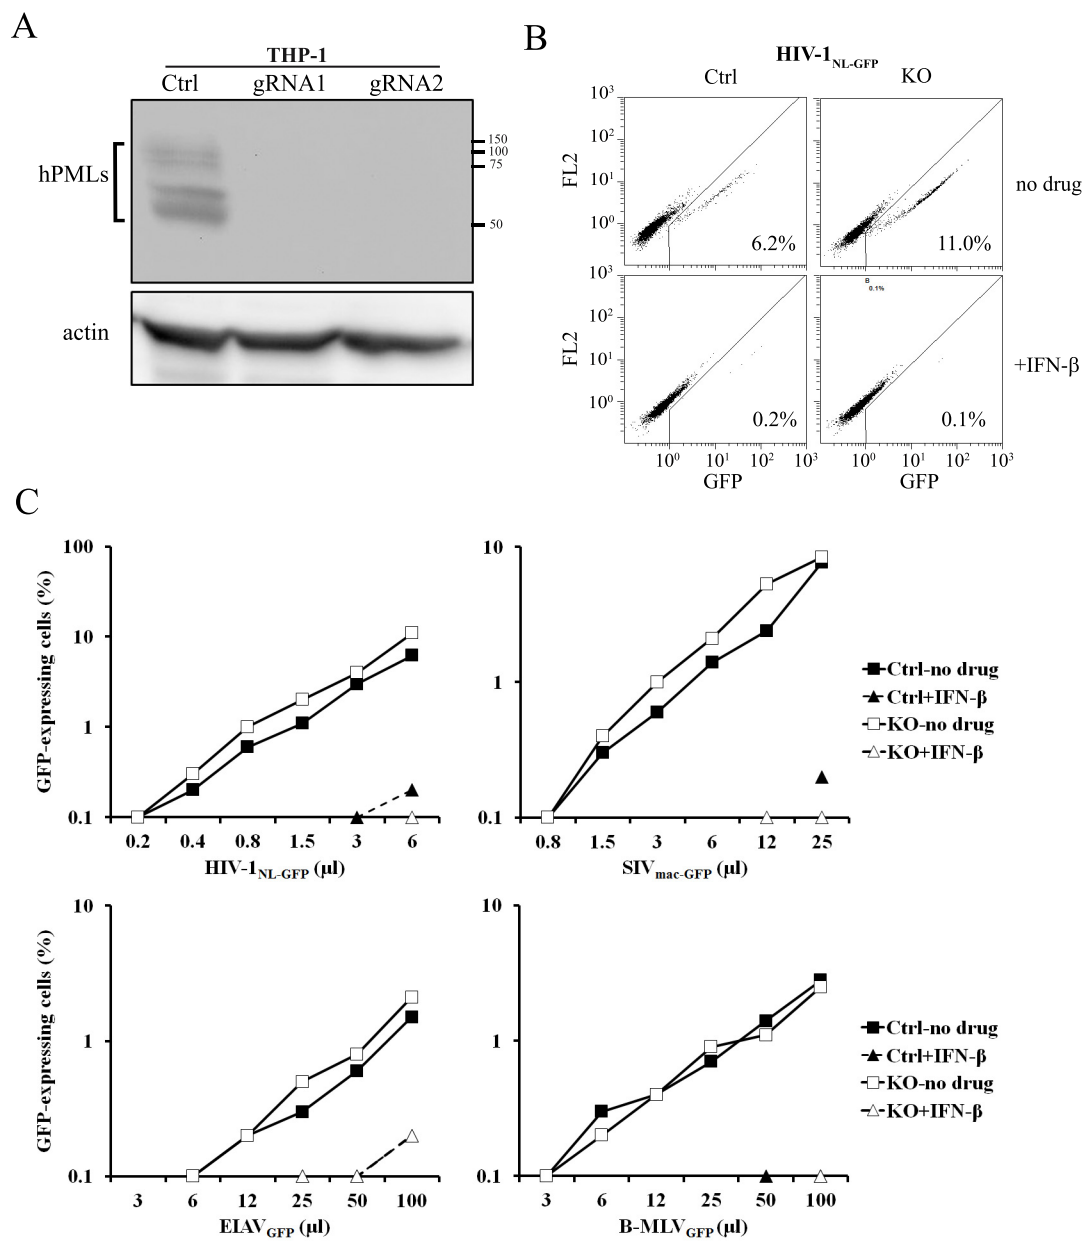

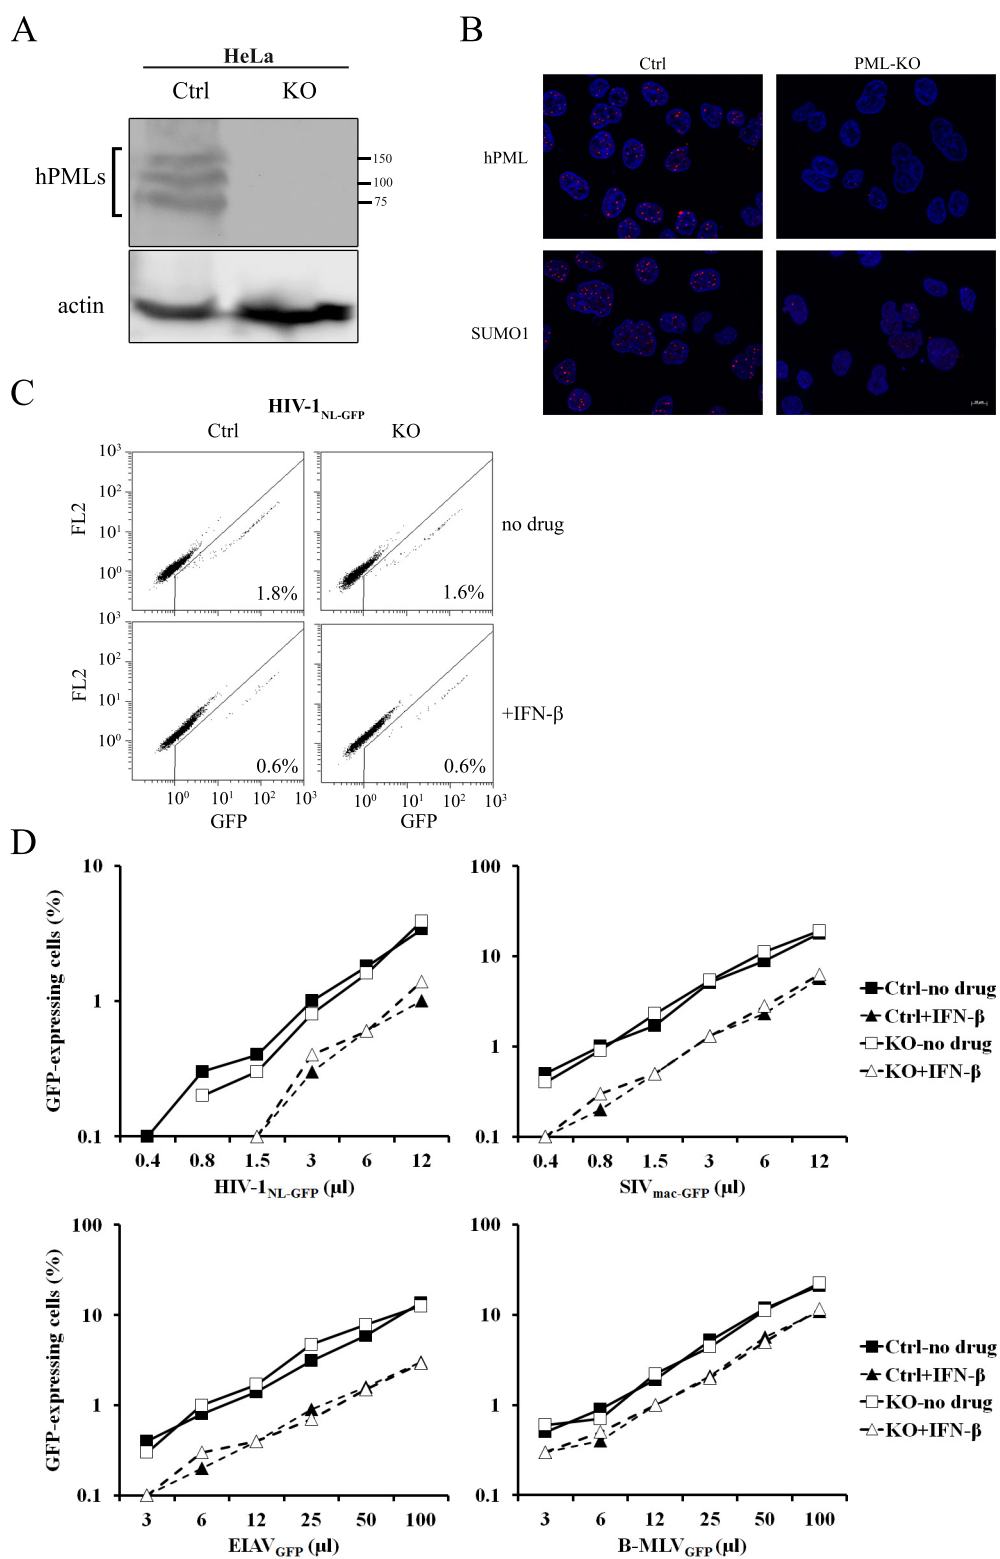

A

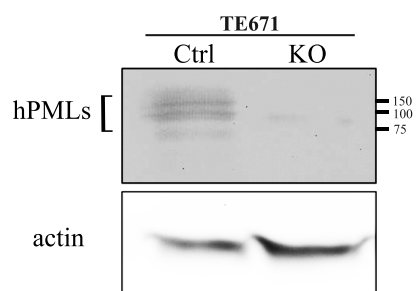

B

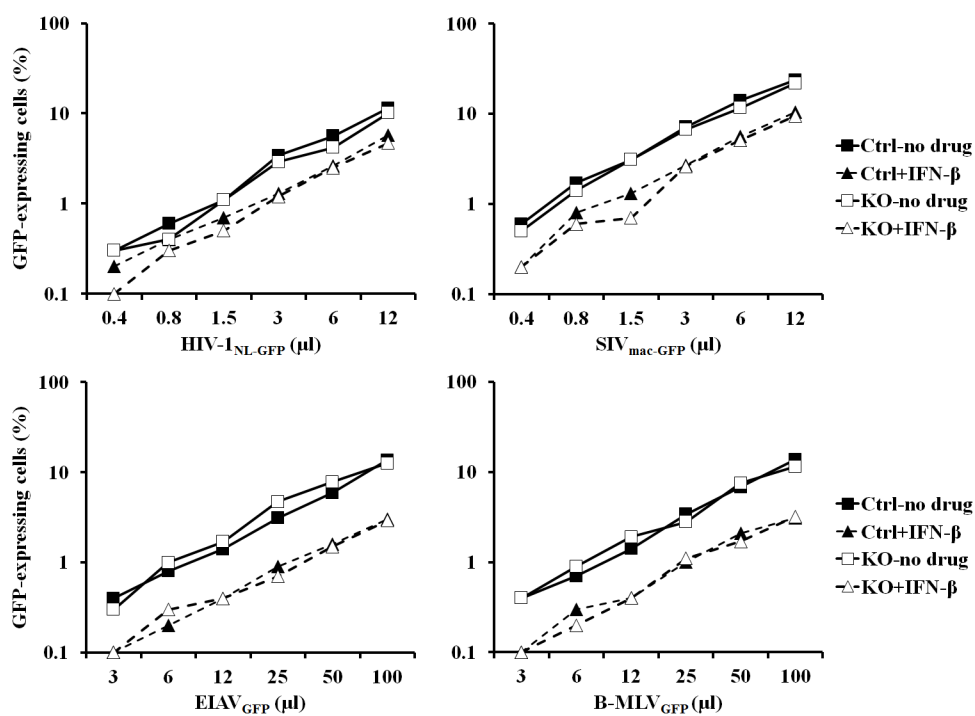

A

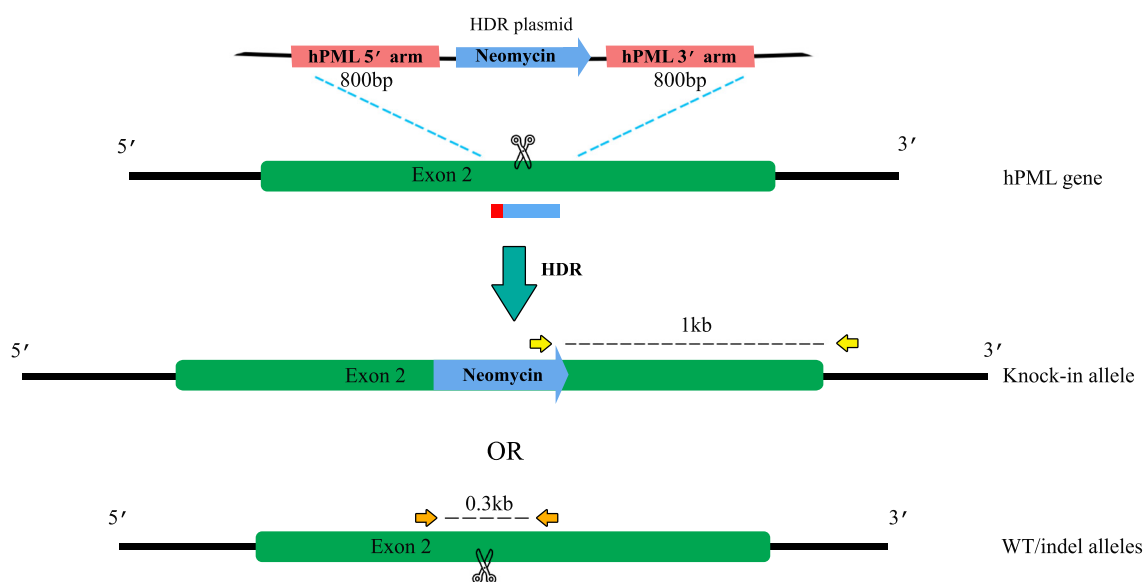

B

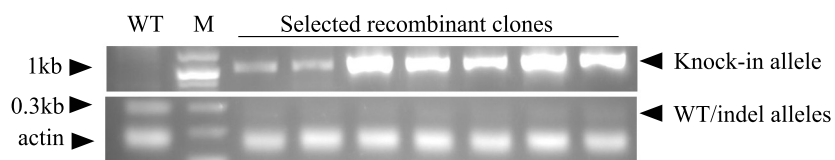

A

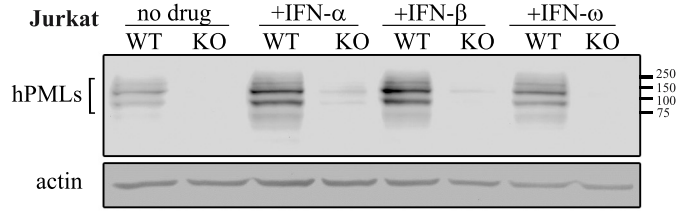

B

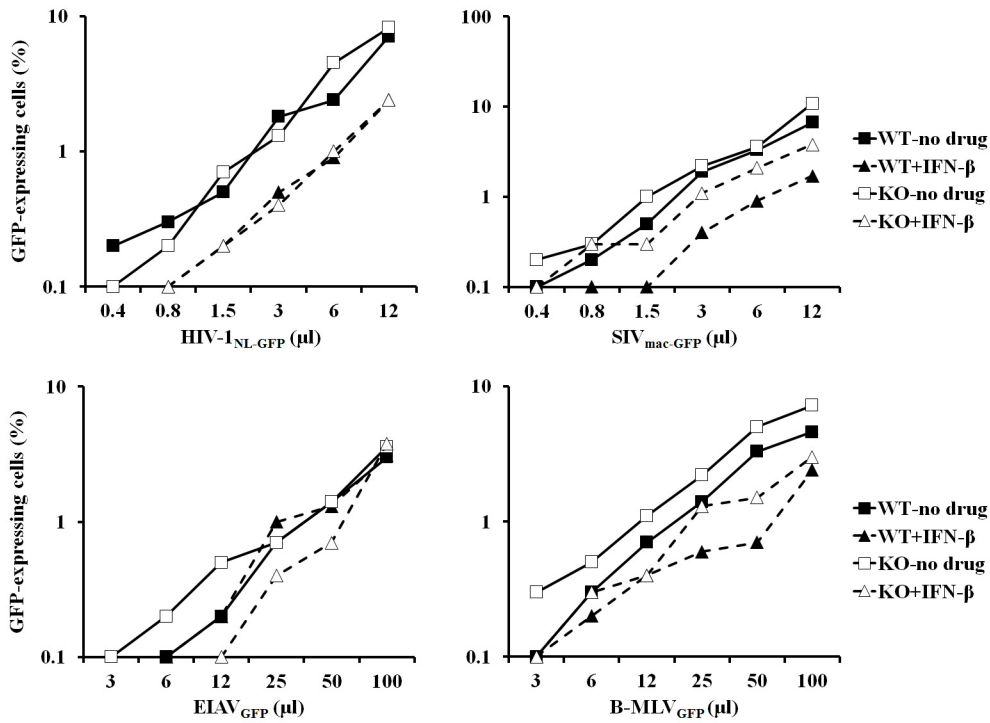

C

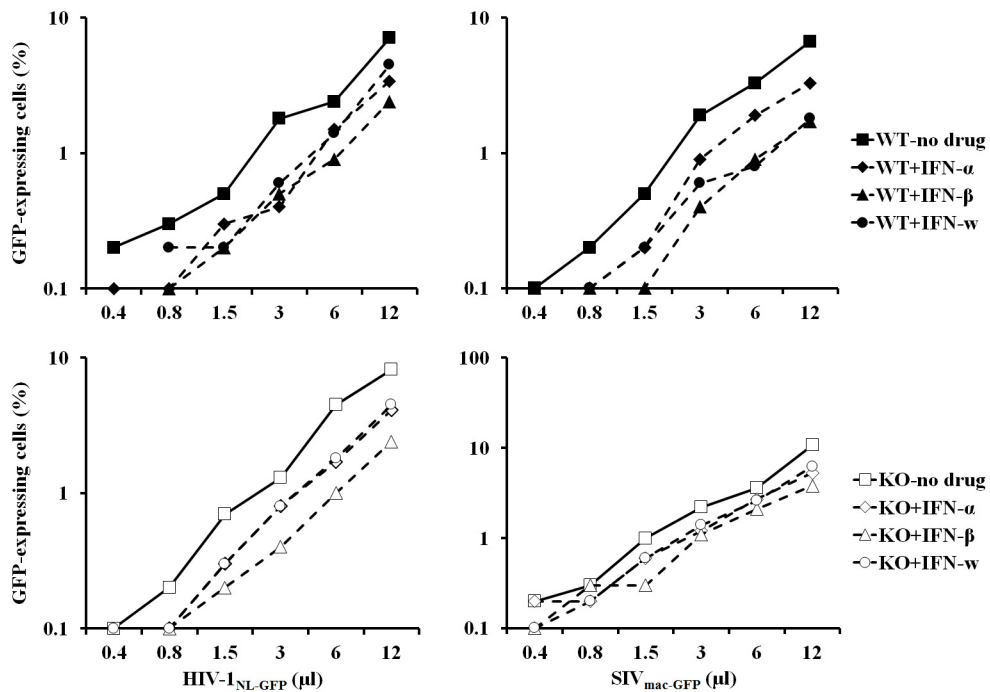

A

Jurkat-KO

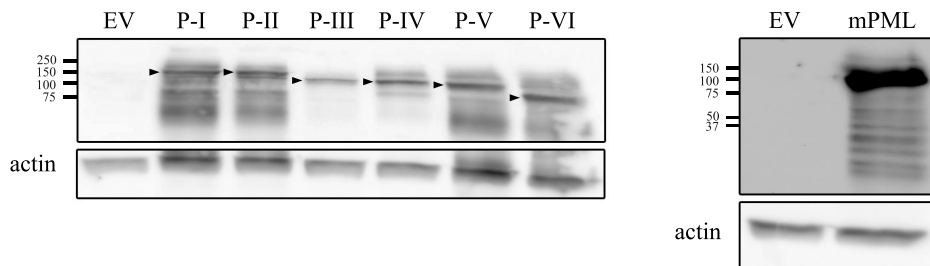

B

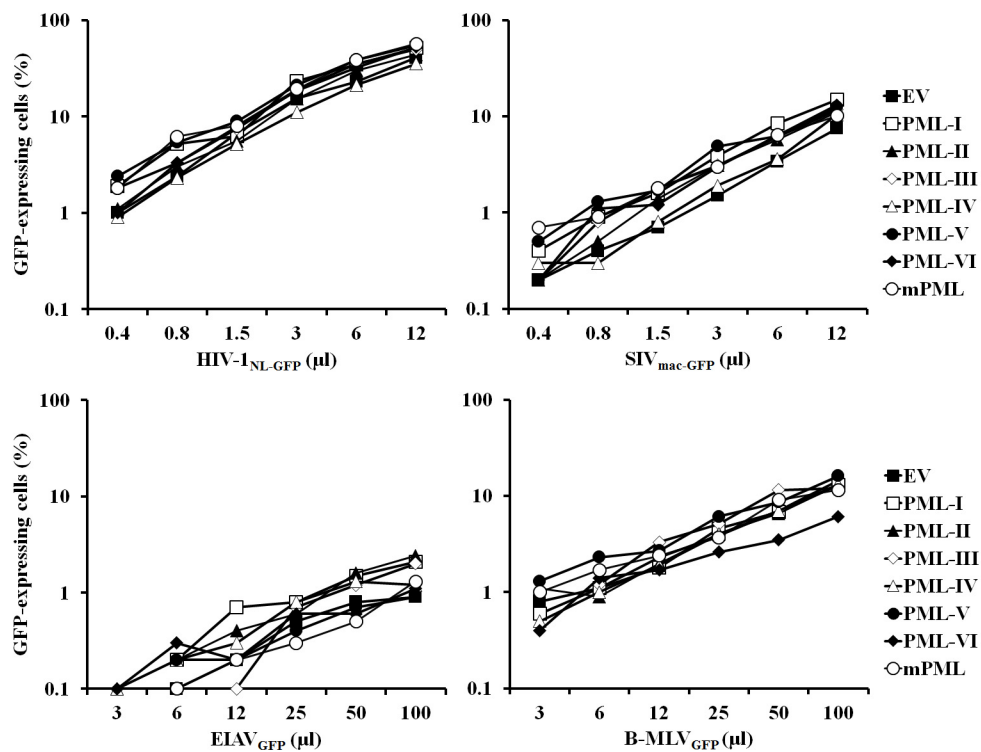



## A HeLa

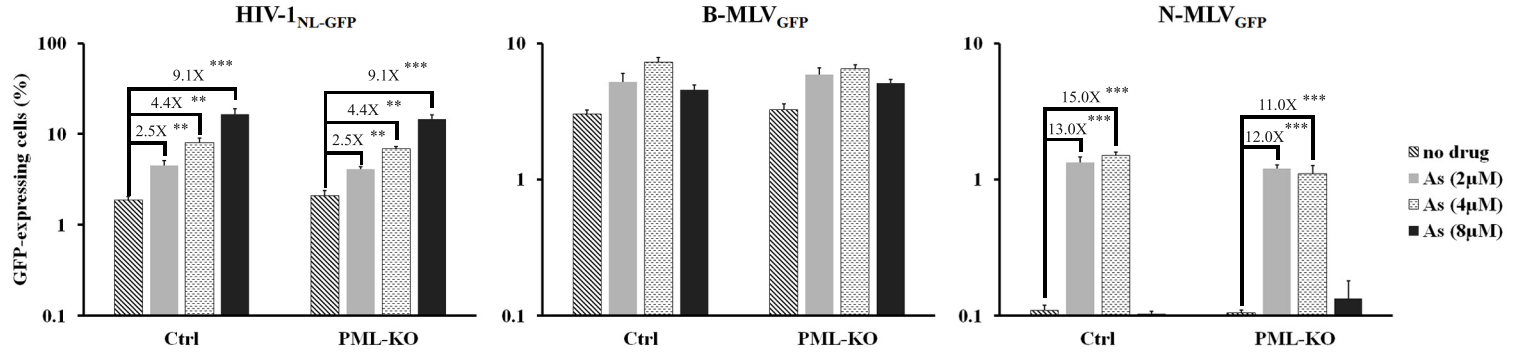

## TE671

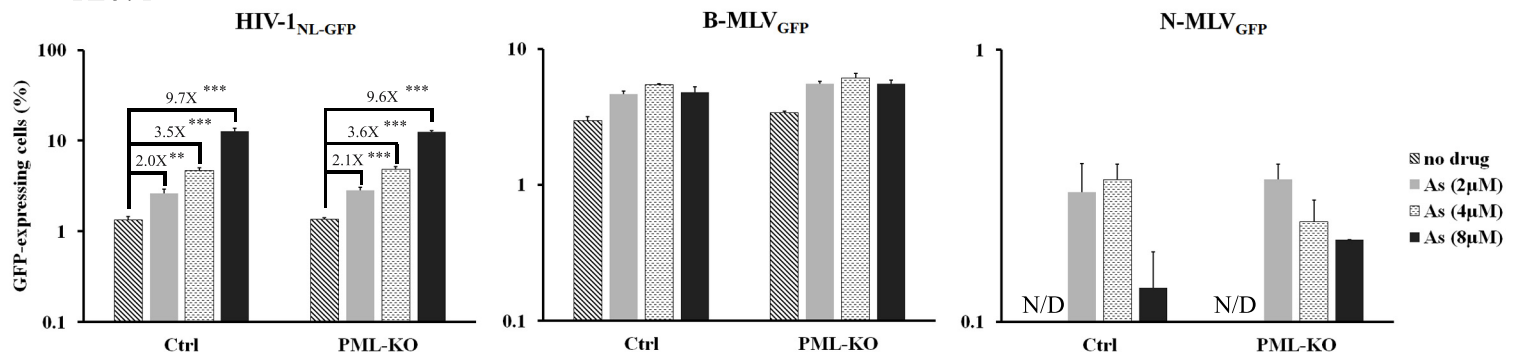

## Jurkat

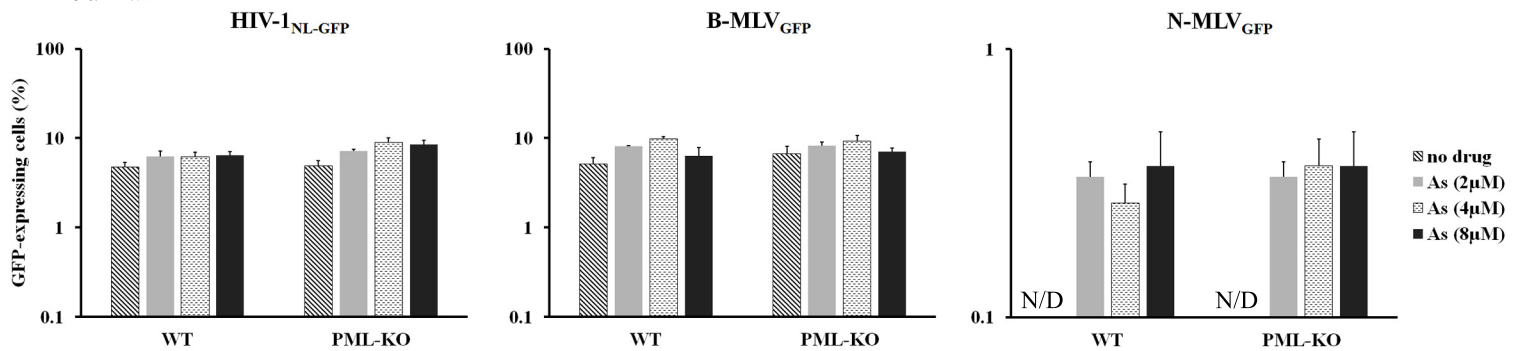

## B

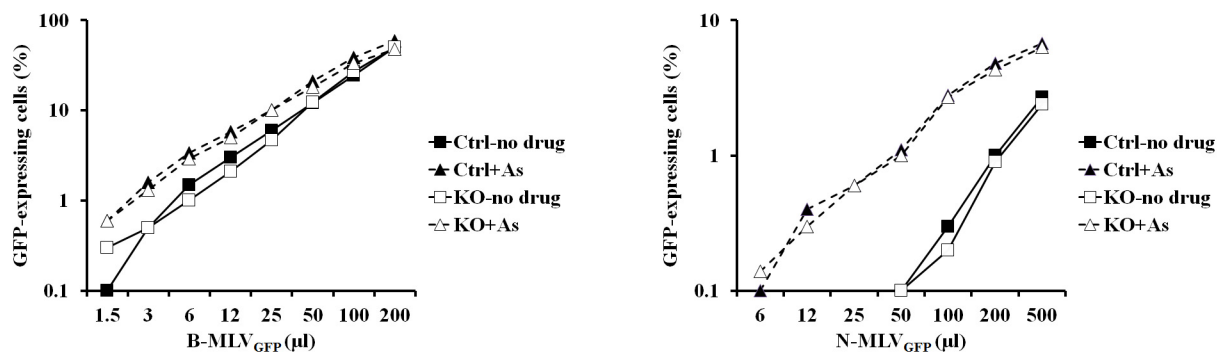

A

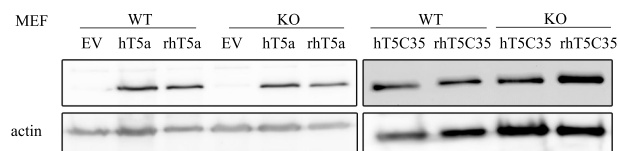

B

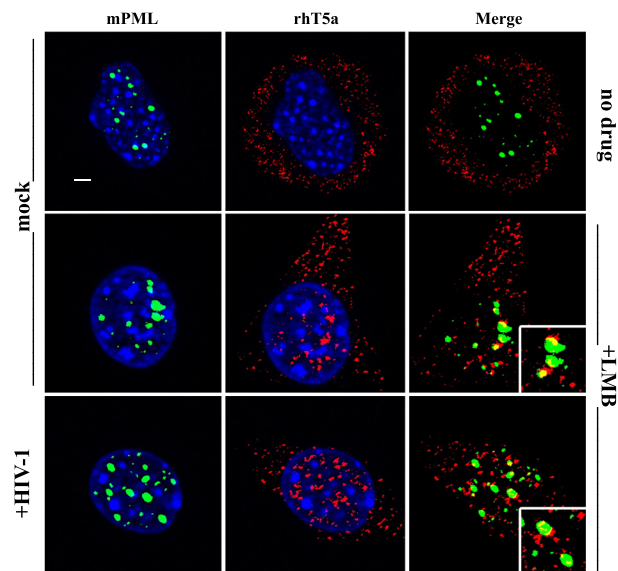

C

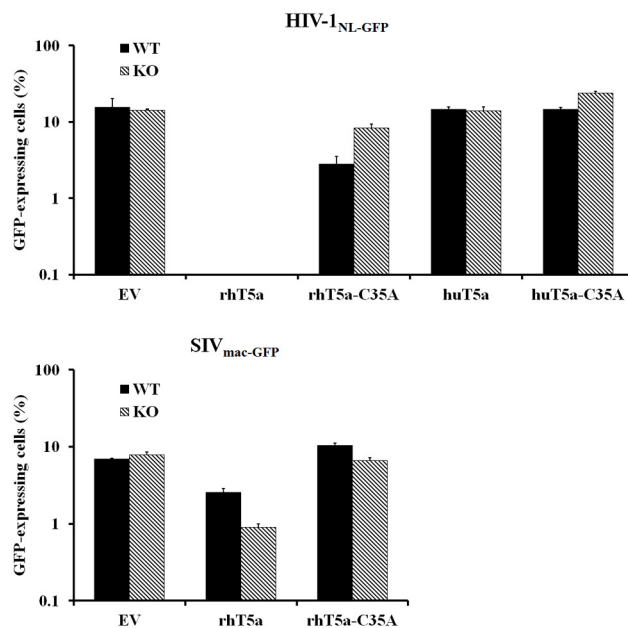

Source: http://biorxiv.org/content/10.1101/109769v2.full.pdf
